# Supplementary material
Source: publisher figshare collection journal article supplement (https://iop.figshare.com/articles/dataset/_/11912046)
Supplement: Supplementary file 1 [file 1]

## Sheet: _@RISKFitInformation
Created By Version	7.5.0
Required Version	5.0.0
Recommended Version	5.0.0
Modified By Version	7.5.0
Count	4
GUID	Name	Range	CRC	Options	Comp. Graph Serialization	PP Graph Serialization	QQ Graph Serialization	Unsued	Fixed Params	Bootstrap Options	BootstrapParamGraphSerialization	BatchFit Options	BootstrapGOFGraphSerialization	FitSelector
FIT_ACEB7_EFF0	Percentage scrapped	#REF!	0	F1 0 0 -1E+300 1E+300 1 0 0 0 0 1 39 BetaGeneral Binomial Burr12 Cauchy ChiSq Dagum Erf Erlang Expon ExtValue ExtValueMin FatigueLife Frechet Gamma Geomet HypSecant IntUniform InvGauss Kumaraswamy Laplace Levy Logistic LogLogistic Lognorm Lognorm2 NegBin Normal Pareto Pareto2 Pearson5 Pearson6 Pert Poisson Rayleigh Reciprocal Student Triang Uniform Weibull 0 1 -1 1 0 1 0 0 0	GF1_rK0qDwEAEADeAQwjACYANACZAK0ArgC8AMoAuAHaAdQBKgD//wAEAAAAAQQAAAAAAAAAAAEmRml0IENvbXBhcmlzb24gZm9yIFBlcmNlbnRhZ2Ugc2NyYXBwZWQAGUZsZWV0IHBlcmNlbnRhZ2Ugc2NyYXBwZWQfUmlza05vcm1hbCgwLjA1OTg0OTksMC4wMDg1MjcyKQEBEAACAAEKU3RhdGlzdGljcwMBAQD/AQEBAQEAAQEBAAQAAAABAQEBAQABAQEABAAAAArpAAH4AAAIAQAeAQA0AQBKAQBgAQB2AQCMAQCiAQANAAVJbnB1dAAAJQEBAgAOAAZOb3JtYWwAAS8BAAIAFAAMVW51c2VkIEN1cnZlAAJPAQACABQADFVudXNlZCB…				0 8	F1 0 1000 .95				2	TRUE
FIT_EE241_9D746	Scappage-to-sales ratio	#REF!	0	F1 0 0 -1E+300 1E+300 1 0 0 0 0 1 25 BetaGeneral Binomial Expon ExtValue ExtValueMin Gamma Geomet IntUniform InvGauss Kumaraswamy Laplace Levy Logistic LogLogistic Lognorm NegBin Normal Pareto Pearson5 Pearson6 Poisson Reciprocal Triang Uniform Weibull 0 1 -1 1 0 1 0 0 0	GF1_rK0qDwEAEADZAQwjACYANACTAKcAqAC2AMQAswHVAc8BKgD//wAEAAAAAQQAAAAAAAAAAAEqRml0IENvbXBhcmlzb24gZm9yIFNjYXBwYWdlLXRvLXNhbGVzIHJhdGlvAS9SaXNrTG9nbm9ybSgwLjYzMzE3LDAuMTcwMzEsUmlza1NoaWZ0KDAuMTU0MjMpKQEBEAACAAEKU3RhdGlzdGljcwMBAQD/AQEBAQEAAQEBAAQAAAABAQEBAQABAQEABAAAAArjAAHyAAADAQAZAQAvAQBFAQBbAQBxAQCHAQCdAQANAAVJbnB1dAAAJQEBAgAPAAdMb2dub3JtAAEvAQACABQADFVudXNlZCBDdXJ2ZQACTwEAAgAUAAxVbnVzZWQgQ3VydmU…				0 8	F1 0 1000 .95				2	TRUE
FIT_75E4_52146	Age	#VALUE!	0	F1 3 0 -1E+300 1E+300 1 0 0 0 0 1 25 BetaGeneral Binomial Expon ExtValue ExtValueMin Gamma Geomet IntUniform InvGauss Kumaraswamy Laplace Levy Logistic LogLogistic Lognorm NegBin Normal Pareto Pearson5 Pearson6 Poisson Reciprocal Triang Uniform Weibull 0 1 -1 1 0 1 0 0 0	GF1_rK0qDwEAEADCAQwjACYANAB+AJIAkwChAK8AngG+AbgBKgD//wAAAAAAAQQAAAAAAAAAAAEWRml0IENvbXBhcmlzb24gZm9yIEFnZQEuUmlza1dlaWJ1bGwoMS41MDc2LDkuMTAyNCxSaXNrU2hpZnQoLTAuNDQzMDYpKQEBEAACAAEKU3RhdGlzdGljcwMBAQD/AQEBAQEAAQEBAAQAAAABAQEBAQABAQEABAAAAArOAAHdAADuAAAEAQAaAQAwAQBGAQBcAQByAQCIAQANAAVJbnB1dAAAJQEBAgAPAAdXZWlidWxsAAEvAQACABQADFVudXNlZCBDdXJ2ZQACTwEAAgAUAAxVbnVzZWQgQ3VydmUAA4wBAAIAFAAMVW51c2VkIEN1cnZ…				0 8	F1 0 1000 .95				3	TRUE
FIT_A882F_C0A7B	Dataset 1	#REF!	0	F1 0 0 -1E+300 1E+300 1 0 0 0 0 1 25 BetaGeneral Binomial Expon ExtValue ExtValueMin Gamma Geomet IntUniform InvGauss Kumaraswamy Laplace Levy Logistic LogLogistic Lognorm NegBin Normal Pareto Pearson5 Pearson6 Poisson Reciprocal Triang Uniform Weibull 0 1 -1 1 0 1 0 0 0	GF1_rK0qDwEAEAC6AQwjACYANAB1AIkAigCYAKYAlAG2AbABKgD//wAAAAAAAQQAAAAAAAAAAAEcRml0IENvbXBhcmlzb24gZm9yIERhdGFzZXQgMQEfUmlza05vcm1hbCgwLjA2MDcxNTUsMC4wMDg1Mjc3KQEBEAACAAEKU3RhdGlzdGljcwMBAQD/AQEBAQEAAQEBAAQAAAABAQEBAQABAQEABAAAAArFAAHUAADkAAD6AAAQAQAmAQA8AQBSAQBoAQB+AQANAAVJbnB1dAAAJQEBAgAOAAZOb3JtYWwAAS8BAAIAFAAMVW51c2VkIEN1cnZlAAJPAQACABQADFVudXNlZCBDdXJ2ZQADjAEAAgAUAAxVbnVzZWQgQ3VydmUABEwBAAIAFAA…				0 8	F1 0 1000 .95				2	TRUE

## Sheet: EV fleet share results
Year	100% EV by 2049	80% EV by 2050	Lower bound (67% EV)	BNEF 2019 (42% EV by 2040)
2019	0.0018999	0.0018999	0.0018999	0.0018999
2020	0.00270468	0.00270468	0.00269936	0.00270468
2021	0.0676426	0.00400654	0.00399381	0.00400654
2022	0.130109	0.00574782	0.00572343	0.00574782
2023	0.191416	0.00786756	0.00783431	0.00786756
2024	0.251797	0.0103057	0.0102614	0.0103057
2025	0.31082	0.012998	0.0129366	0.012998
2026	0.368647	0.0161875	0.0161099	0.0161875
2027	0.425193	0.0194999	0.0194092	0.0194999
2028	0.479883	0.022899	0.0227979	0.022899
2029	0.53288	0.0264209	0.0263093	0.0264209
2030	0.584031	0.0300756	0.0299541	0.0300756
2031	0.633239	0.033823	0.0337016	0.033823
2032	0.680259	0.0376926	0.037578	0.0376926
2033	0.724836	0.0416397	0.0415369	0.0416397
2034	0.765891	0.0456536	0.0455614	0.0456536
2035	0.802404	0.0497184	0.0496389	0.106189
2036	0.834239	0.0537824	0.0537171	0.166097
2037	0.861684	0.0578076	0.0577536	0.225429
2038	0.885095	0.11778	0.0617577	0.284111
2039	0.904935	0.17736	0.0656767	0.342122
2040	0.921443	0.236459	0.069465	0.39908
2041	0.935011	0.294824	0.129376	0.454595
2042	0.946435	0.352367	0.188719	0.508532
2043	0.956079	0.408737	0.247357	0.560626
2044	0.964472	0.464008	0.30551	0.610876
2045	0.971879	0.517927	0.363059	0.659158
2046	0.978459	0.57025	0.419685	0.705173
2047	0.984629	0.620827	0.475263	0.74899
2048	0.989607	0.668841	0.528963	0.78887
2049	0.993476	0.713883	0.580329	0.823691
2050	0.996621	0.756168	0.629465	0.853656
2051	0.999221	0.79475	0.676198	0.879156

## Sheet: Model run input & results
Note: The user can change the first year of all EV sales by etnering the year in cell D1	Selling only EVs starting 2040	User Input (starting year of only EV sales)	2040
Year	EV car stock (thousands)	EV light truck stock (thousands)	Total EV stock (thousands)	ICE car stock (thousands)	ICE light truck stock (thousands)	Total ICE stock (thousands)	Total LDV stock (thousands)	%EV stock	EV car miles (billions)	EV light truck miles (billions)	Total EV miles (billions)	ICE car miles (billions)	ICE light truck miles (billions)	Total ICE miles (billions)	Total LDV miles (billions)	%EV miles	EV share difference (%miles-%stock)
2018	419.954	43.256	463.21	126427	116918	243345	243808	0.0018999	5.37653	0.625946	6.00248	1393.35	1388.2	2781.54	2787.55	0.00215332	0.000253422
2019	592.01	69.5765	661.587	125497	118932	244429	245091	0.00269936	7.60994	1.00973	8.61966	1389.67	1405.11	2794.78	2803.4	0.00307472	0.000375358
2020	867.296	117.519	984.815	125219	120381	245601	246585	0.00399381	11.2112	1.71217	12.9234	1392.34	1414.51	2806.85	2819.77	0.00458314	0.000589332
2021	1233.62	185.537	1419.16	125248	121289	246537	247956	0.00572343	15.9728	2.69956	18.6724	1396.57	1416.87	2813.44	2832.11	0.0065931	0.000869663
2022	1687.64	266.788	1954.42	125560	121955	247515	249470	0.00783431	21.816	3.85828	25.6743	1402.87	1416.86	2819.73	2845.4	0.00902309	0.00118878
2023	2220.99	358.106	2579.1	126304	122457	248761	251340	0.0102614	28.5965	5.13506	33.7316	1412.59	1415.61	2828.2	2861.93	0.0117863	0.00152492
2024	2811.24	465.981	3277.22	127275	122776	250051	253329	0.0129366	35.982	6.62634	42.6084	1423.73	1412.71	2836.44	2879.05	0.0147995	0.00186283
2025	3518.79	589.81	4108.6	128179	122747	250927	255035	0.0161099	44.8006	8.3174	53.118	1433.27	1407.48	2840.75	2893.87	0.0183554	0.00224541
2026	4271.35	711.06	4982.41	129078	122642	251721	256703	0.0194092	54.0191	9.91995	63.9391	1442.16	1402.66	2844.82	2908.76	0.0219815	0.00257233
2027	5062.91	826.376	5889.29	129985	122451	252436	258325	0.0227979	63.5603	11.388	74.9483	1450.83	1397.23	2848.06	2923.01	0.0256408	0.00284287
2028	5898.47	938.901	6837.37	130870	122177	253047	259884	0.0263093	73.4941	12.7766	86.2707	1459.21	1391.43	2850.64	2936.91	0.0293746	0.00306529
2029	6774.36	1049.47	7823.83	131609	121761	253370	261194	0.0299541	83.7654	14.1046	97.87	1466.02	1384.56	2850.58	2948.45	0.0331937	0.0032396
2030	7683.11	1157.08	8840.18	132175	121292	253467	262307	0.0337016	94.2733	15.3615	109.635	1471.23	1377.68	2848.9	2958.54	0.0370571	0.00335546
2031	8630.49	1261.06	9891.55	132609	120726	253335	263227	0.037578	105.108	16.5433	121.652	1475.24	1370.22	2845.47	2967.12	0.0409999	0.00342189
2032	9600.87	1361.61	10962.5	132898	120061	252959	263921	0.0415369	116.076	17.6588	133.735	1477.68	1362	2839.68	2973.42	0.044977	0.00344005
2033	10591.2	1458.14	12049.3	133067	119346	252413	264463	0.0455614	127.172	18.7046	145.877	1478.74	1353.43	2832.17	2978.04	0.0489841	0.00342262
2034	11601	1551	13152	133174	118628	251802	264954	0.0496389	138.431	19.6912	158.122	1479.28	1345.1	2824.38	2982.5	0.0530166	0.00337771
2035	12618.1	1639.26	14257.4	133237	117921	251158	265416	0.0537171	149.716	20.6095	170.325	1479.41	1337.21	2816.63	2986.95	0.0570231	0.00330599
2036	13633.1	1723.21	15356.3	133283	117254	250537	265893	0.0577536	160.93	21.4692	182.399	1479.41	1330.05	2809.47	2991.86	0.060965	0.00321133
2037	14648.7	1802.73	16451.4	133315	116620	249935	266386	0.0617577	172.134	22.2718	194.406	1479.37	1323.29	2802.66	2997.06	0.0648655	0.00310781
2038	15657.6	1877.15	17534.8	133368	116084	249451	266986	0.0656767	183.25	23.0103	206.261	1479.74	1317.89	2797.63	3003.89	0.0686644	0.00298771
2039	16654.7	1946.72	18601.5	133464	115716	249180	267782	0.069465	194.227	23.6915	217.919	1480.79	1314.39	2795.19	3013.11	0.0723235	0.00285851
2040	26161.2	8608.48	34769.7	125064	108916	233980	268750	0.129376	323.105	125.254	448.359	1364.15	1211.65	2575.8	3024.16	0.148259	0.018883
2041	35669.9	15245.3	50915.2	116677	102202	218879	269795	0.188719	448.541	223.172	671.713	1251.23	1113.46	2364.69	3036.4	0.22122	0.0325013
2042	45156.2	21844.1	67000.3	108297	95567.1	203864	270864	0.247357	570.314	317.384	887.699	1141.85	1019.56	2161.41	3049.1	0.291134	0.0437771
2043	54652.5	28435.1	83087.6	99929.7	88946.2	188876	271964	0.30551	689.001	408.501	1097.5	1035.91	929.256	1965.17	3062.67	0.358349	0.0528385
2044	64143.8	35007.8	99151.6	91602	82346.9	173949	273100	0.363059	804.563	496.537	1301.1	933.643	842.596	1776.24	3077.34	0.4228	0.0597412
2045	73598.8	41519.6	115118	83354.2	75824.4	159179	274297	0.419685	916.743	581.079	1497.82	835.322	760.011	1595.33	3093.15	0.484238	0.0645527
2046	82960.9	47958.4	130919	75216.6	69331.4	144548	275467	0.475263	1024.97	662.17	1687.14	741.113	681.019	1422.13	3109.27	0.542615	0.0673528
2047	92165.8	54258.7	146424	67237.2	63152.3	130390	276814	0.528963	1128.66	739.119	1867.78	651.39	607.72	1259.11	3126.89	0.597328	0.0683646
2048	101104	60330.9	161435	59448.8	57294.6	116743	278178	0.580329	1226.59	810.873	2037.46	566.275	540.036	1106.31	3143.77	0.648095	0.0677655
2049	109836	66235.9	176072	51899.5	51745.6	103645	279717	0.629465	1319.99	878.732	2198.73	486.039	477.717	963.756	3162.48	0.695253	0.0657885
2050	118321	71942.6	190263	44618.9	46489.9	91108.9	281372	0.676198	1408.65	942.548	2351.2	410.759	420.453	831.212	3182.41	0.738811	0.0626125
			1.84555e+06	1845.55
				184.555

## Sheet: EIA AEO 2018 reference case
Source: https://www.eia.gov/outlooks/aeo/data/browser/#/?id=48-AEO2018&sourcekey=0
Year	Total New Car Sales (thousands)	Total New Light Truck Sales (thousands)	Total Vehicles Sales (thousands)	Total New EV Car Sales (thousands)	Total New EV Light Truck Sales (thousands)	Total Car Stock (thousands)	Total Light Truck Stock (thousands)	Total Stock (thousands)	Total EV Car Stock (thousands)	Total EV Light Truck Stock (thousands)
2018	8605.59	7497.4	16103	95.4298	15.1371	126847	116961	243808	419.954	43.256
2019	8524.14	7527.93	16052.1	175.549	26.9099	128173	117230	245403
2020	8780.21	7190.81	15971	280.318	48.8288	129694	117167	246861
2021	8738.34	6857.91	15596.2	373.506	69.4708	131089	116801	247890
2022	8816.36	6798.05	15614.4	463.95	83.4998	132482	116407	248889
2023	8950.68	6791.52	15742.2	547.048	94.625	133940	116044	249983
2024	9036.2	6750.17	15786.4	609.402	112.554	135409	115681	251090
2025	9088.81	6767.98	15856.8	734.379	130.361	136856	115381	252236
2026	9145.82	6855.34	16001.2	789.905	130.147	138282	115218	253500
2027	9253.01	6820.23	16073.2	843.415	127.007	139738	115060	254798
2028	9385.59	6814.32	16199.9	904.022	127.443	141249	114936	256185
2029	9464.12	6771.18	16235.3	962.521	129.291	142758	114798	257555
2030	9555.84	6778.26	16334.1	1016.08	130.587	144274	114676	258950
2031	9635.81	6752.17	16388	1078.93	131.717	145783	114535	260318
2032	9634.65	6701.31	16336	1132.7	133.412	147201	114336	261537
2033	9626.98	6656.55	16283.5	1191.58	134.835	148524	114051	262575
2034	9685.6	6648.15	16333.7	1258.57	136.86	149817	113737	263554
2035	9730.64	6647.32	16378	1320.26	138.211	151060	113426	264486
2036	9779.78	6659.98	16439.8	1378.18	140.063	152254	113140	265394
2037	9847.08	6637.48	16484.6	1442.17	141.804	153408	112859	266266
2038	9945.13	6674.62	16619.8	1502.33	142.828	154561	112649	267211
2039	10054.6	6718.54	16773.1	1560.03	144.023	155736	112504	268240
2040	10138.2	6742.12	16880.3	1614.66	146.139	156907	112403	269310
2041	10233.8	6782.2	17016	1660.65	148.192	158095	112363	270458
2042	10303.8	6809.05	17112.9	1702.67	150.455	159279	112372	271651
2043	10404.6	6866.25	17270.8	1749.4	152.881	160491	112459	272950
2044	10523.6	6939.29	17462.9	1800.15	156.238	161748	112632	274381
2045	10636	7010.14	17646.1	1849.53	159.858	163045	112882	275926
2046	10716.8	7089.11	17805.9	1890.57	163.145	164348	113211	277559
2047	10784.6	7143.58	17928.1	1938.69	167.157	165644	113594	279238
2048	10769.1	7135.78	17904.9	1977.85	170.845	166850	113964	280814
2049	10856.7	7215.92	18072.7	2031.43	175.479	168067	114406	282473
2050	10937.9	7287.36	18225.3	2088.32	181.007	169287	114908	284195

## Sheet: EV car stock and miles
				car survival curve	1	0.997	0.996991	0.996982	0.992936	0.989837	0.986653	0.980229	0.976645	0.970652	0.965286	0.958237	0.953995	0.911168	0.85376	0.831974	0.813725	0.8	0.786145	0.777778	0.773399	0.764331	0.766667	0.76087	0.757143	0.754717	0.75	0.766667	0.565217	0.769231	0.7	0.285714
				2018 Auto EV A age dist (VISION18)		0.164147	0.176089	0.143627	0.249727	0.147463	0.0630033	0.0502326	0.000768536	0.000523601	0.000381607	0.000111991	9.96699e-05	4.77597e-05	8.42148e-05	0.000171747	0.000181492	0.000520281	0.000876508	0.000875397	0.00106765	0	0	0	0	0	0	0	0	0	0	0
				2018 Auto EV A annual miles dist (VISION18)	13852.1	13439.8	13041	12655.9	12284.4	11926.5	11582.2	11251.5	10934.4	10630.9	10341	10064.7	9801.99	9552.9	9317.4	9095.51	8887.22	8692.53	8511.44	8343.96	8190.08	8049.8	7923.12	7810.04	7710.56	7710.56	7710.56	7710.56	7710.56	7710.56	7710.56	7710.56
				EV car stock (thousands)
				Year/age	0	1	2	3	4	5	6	7	8	9	10	11	12	13	14	15	16	17	18	19	20	21	22	23	24	25	26	27	28	29	30	31	Total
				2018	95.4298	53.2697	57.1452	46.6105	81.0425	47.8553	20.4461	16.3017	0.249408	0.169921	0.123841	0.0363439	0.0323453	0.0154992	0.0273297	0.0557361	0.0588987	0.168844	0.284448	0.284087	0.346479	0	0	0	0	0	0	0	0	0	0	0	419.954
				2019	175.549	95.1435	53.1094	56.9728	46.2813	80.2189	47.2165	20.0419	15.921	0.242089	0.164023	0.118669	0.0346719	0.029472	0.0132326	0.0227376	0.0453539	0.0471189	0.132736	0.221237	0.219713	0.264824	0	0	0	0	0	0	0	0	0	0	592.01
				2020	280.318	175.023	94.8572	52.9491	56.5703	45.8109	79.1482	46.283	19.5738	15.4537	0.233685	0.157172	0.113209	0.0315919	0.025162	0.0110092	0.0185022	0.0362831	0.0370423	0.103239	0.171105	0.167933	0.203032	0	0	0	0	0	0	0	0	0	867.296
				2021	373.506	279.477	174.496	94.5709	52.5751	55.9954	45.1995	77.5834	45.2021	18.9993	14.9173	0.223925	0.149942	0.103153	0.0269719	0.0209341	0.00895844	0.0148018	0.0285238	0.0288107	0.0798448	0.130781	0.128749	0.154481	0	0	0	0	0	0	0	0	1233.62
				2022	463.95	372.385	278.636	173.969	93.9029	52.0408	55.248	44.3059	75.7714	43.8755	18.3398	14.2943	0.213624	0.136622	0.0880676	0.0224399	0.0170346	0.00716675	0.0116363	0.0221852	0.0222821	0.0610279	0.100265	0.0979612	0.116964	0	0	0	0	0	0	0	1687.64
				2023	547.048	462.558	371.265	277.795	172.74	92.9486	51.3462	54.1557	43.2711	73.5477	42.3524	17.5739	13.6367	0.194647	0.116642	0.07327	0.0182599	0.0136277	0.0056341	0.00905047	0.017158	0.0170309	0.046788	0.0762888	0.0741706	0.0882748	0	0	0	0	0	0	2220.99
				2024	609.402	545.407	461.166	370.144	275.833	170.985	91.708	50.3311	52.8909	42.0012	70.9945	40.5836	16.7654	12.4253	0.166182	0.0970435	0.0596216	0.0146079	0.0107134	0.00438208	0.00699963	0.0131144	0.0130571	0.0355996	0.0577615	0.0559778	0.0662061	0	0	0	0	0	2811.24
				2025	734.379	607.574	543.766	459.774	367.53	273.03	168.703	89.8949	49.1556	51.3387	40.5431	68.0296	38.7166	15.2761	10.6082	0.138259	0.0789668	0.0476973	0.011484	0.00833261	0.0033891	0.00535003	0.0100544	0.00993471	0.026954	0.0435936	0.0419834	0.050758	0	0	0	0	3518.79
				2026	789.905	732.176	605.746	542.124	456.526	363.795	269.386	165.367	87.7954	47.713	49.5565	38.8499	64.8999	35.2773	13.0421	8.82577	0.112505	0.0631734	0.037497	0.00893196	0.00644443	0.00259039	0.00410169	0.00765006	0.007522	0.0203426	0.0326952	0.0321872	0.0286893	0	0	0	4271.35
				2027	843.415	787.535	729.973	603.917	538.295	451.887	358.939	264.06	161.505	85.2188	46.0567	47.4869	37.0626	59.1347	30.1184	10.8507	7.18175	0.0900039	0.0496634	0.0291643	0.00690797	0.00492568	0.00198597	0.00312085	0.00579218	0.00567698	0.015257	0.0250663	0.0181928	0.0220687	0	0	5062.91
				2028	904.022	840.885	785.165	727.77	599.652	532.825	445.856	351.842	257.893	156.765	82.2605	44.1332	45.3022	33.7703	50.4868	25.0577	8.82948	5.7454	0.0707561	0.0386271	0.0225557	0.00527998	0.00377635	0.00151106	0.00236293	0.00437146	0.00425773	0.011697	0.0141679	0.0139945	0.0154481	0	5898.47
				2029	962.521	901.31	838.355	782.796	722.629	593.558	525.713	437.04	343.625	250.324	151.323	78.825	42.1028	41.2779	28.8317	42.0037	20.3901	7.06358	4.51672	0.0550325	0.0298742	0.01724	0.00404798	0.00287331	0.00114409	0.00178334	0.0032786	0.00326426	0.00661135	0.0108984	0.00979612	0.00441374	6774.36
				2030	1016.08	959.634	898.598	835.824	777.266	715.285	585.635	515.319	426.834	333.541	241.634	145.004	75.1987	38.3627	35.2415	23.9872	34.1795	16.3121	5.553	3.513	0.0425621	0.0228338	0.0132173	0.00307999	0.00217551	0.000863464	0.00133751	0.00251359	0.00184502	0.00508565	0.00762888	0.00279889	7683.11
				2031	1078.93	1013.03	956.746	895.886	829.92	769.367	705.739	574.057	503.284	414.307	321.962	231.543	138.333	68.5186	32.7526	29.32	19.519	27.3436	12.8236	4.319	2.71695	0.0325315	0.0175059	0.0100567	0.00233199	0.00164189	0.000647598	0.00102542	0.00142072	0.00141924	0.00355996	0.00217968	8630.49
				2032	1132.7	1075.69	1009.98	953.859	889.558	821.486	759.099	691.785	560.65	488.514	399.925	308.516	220.891	126.044	58.4985	27.2493	23.8584	15.6152	21.496	9.97394	3.34031	2.07665	0.0249408	0.0133197	0.00761433	0.00175999	0.00123142	0.000496492	0.000579587	0.00109287	0.000993471	0.00101713	9600.87
				2033	1191.58	1129.31	1072.46	1006.93	947.121	880.517	810.522	744.09	675.629	544.196	471.555	383.222	294.323	201.268	107.612	48.6692	22.1735	19.0867	12.2758	16.7191	7.71384	2.5531	1.5921	0.0189767	0.0100849	0.00574666	0.00131999	0.000944089	0.000280626	0.000445836	0.000765006	0.000283849	10591.2
				2034	1258.57	1188.01	1125.91	1069.22	999.82	937.496	868.765	794.497	726.713	655.801	525.305	451.862	365.592	268.177	171.835	89.5301	39.6034	17.7388	15.0049	9.54786	12.9306	5.89593	1.95738	1.21138	0.0143681	0.00761125	0.00431	0.001012	0.000533615	0.000215866	0.000312085	0.000218573	11601
				2035	1320.26	1254.8	1184.44	1122.51	1061.67	989.659	924.983	851.589	775.942	705.385	633.035	503.366	431.074	333.116	228.959	142.962	72.8529	31.6827	13.9452	11.6705	7.38431	9.88323	4.52021	1.48931	0.917188	0.0108438	0.00570844	0.00330433	0.000571998	0.000410473	0.000151106	8.91672e-05	12618.1
				2036	1378.18	1316.29	1251.02	1180.86	1114.58	1050.88	976.45	906.695	831.7	753.17	680.898	606.597	480.209	392.78	284.401	190.488	116.332	58.2823	24.9072	10.8463	9.02596	5.64406	7.57714	3.43929	1.12762	0.692217	0.00813288	0.00437647	0.00186767	0.000439998	0.000287331	4.31732e-05	13633.1
				2037	1442.17	1374.05	1312.33	1247.24	1172.52	1103.25	1036.85	957.145	885.52	807.292	727.024	652.461	578.691	437.551	335.34	236.614	155.005	93.0656	45.8183	19.3722	8.38851	6.89882	4.32711	5.76522	2.60403	0.851034	0.519163	0.00623521	0.00247366	0.00143667	0.000307999	8.20947e-05	14648.7
				2038	1502.33	1437.84	1369.92	1308.37	1238.43	1160.6	1088.53	1016.35	934.791	859.532	779.267	696.661	622.445	527.284	373.563	278.994	192.539	124.004	73.163	35.6365	14.9825	6.4116	5.28909	3.29237	4.36509	1.96531	0.638276	0.398025	0.00352425	0.00190281	0.00100567	8.79996e-05	15657.6
				2039	1560.03	1497.82	1433.51	1365.78	1299.13	1225.85	1145.11	1067.01	992.615	907.357	829.693	746.722	664.611	567.152	450.175	310.795	227.025	154.031	97.485	56.9046	27.5612	11.4516	4.91556	4.02431	2.49279	3.29441	1.47398	0.489345	0.224971	0.00271096	0.00133197	0.000287333	16654.7
				2040	10138.2	1555.35	1493.32	1429.19	1356.13	1285.93	1209.49	1122.47	1042.09	963.484	875.859	795.043	712.369	605.572	484.212	374.533	252.902	181.62	121.091	75.8217	44.0099	21.0659	8.77954	3.7401	3.04698	1.88135	2.47081	1.13005	0.276586	0.173054	0.00189767	0.000380563	26161.2
				2041	10233.8	10107.8	1550.67	1488.81	1419.09	1342.35	1268.77	1185.57	1096.26	1011.51	930.037	839.28	758.467	649.088	517.013	402.852	304.767	202.321	142.779	94.1818	58.6404	33.6382	16.1505	6.68009	2.83179	2.29961	1.41101	1.89429	0.638725	0.212759	0.121138	0.000542192	35669.9
				2042	10303.8	10203.1	10077.4	1545.99	1478.29	1404.67	1324.43	1243.68	1157.89	1064.09	976.391	891.196	800.669	691.09	554.165	430.142	327.811	243.814	159.054	111.051	72.8401	44.8207	25.7893	12.2884	5.05778	2.1372	1.7247	1.08178	1.07068	0.491327	0.148931	0.0346109	45156.2
				2043	10404.6	10272.9	10172.4	10047	1535.07	1463.27	1385.92	1298.25	1214.63	1123.9	1027.15	935.614	850.196	729.544	590.026	461.051	350.017	262.248	191.673	123.709	85.8865	55.6739	34.3625	19.6223	9.30411	3.81719	1.6029	1.32227	0.61144	0.823603	0.343929	0.0425517	54652.5
				2044	10523.6	10373.3	10242	10141.7	9975.99	1519.47	1443.74	1358.52	1267.93	1178.99	1084.89	984.249	892.571	774.671	622.855	490.886	375.169	280.014	206.165	149.079	95.6761	65.6457	42.6834	26.1454	14.8569	7.02197	2.86289	1.22889	0.747372	0.470338	0.576522	0.0982655	64143.8
				2045	10636	10492	10342.1	10211.1	10070.1	9874.61	1499.19	1415.2	1326.79	1230.72	1138.06	1039.58	938.969	813.282	661.384	518.199	399.446	300.135	220.131	160.351	115.298	73.1282	50.3284	32.4765	19.7958	11.2127	5.26647	2.19489	0.69459	0.574902	0.329237	0.164721	73598.8
				2046	10716.8	10604.1	10460.5	10310.9	10138.9	9967.73	9742.81	1469.55	1382.15	1287.85	1187.99	1090.53	991.755	855.558	694.348	550.254	421.672	319.557	235.95	171.213	124.015	88.1255	56.065	38.2933	24.5893	14.9402	8.40954	4.03763	1.24059	0.5343	0.402431	0.0940676	82960.9
				2047	10784.6	10684.7	10572.2	10428.9	10238.1	10035.9	9834.69	9550.18	1435.22	1341.58	1243.15	1138.38	1040.36	903.655	730.441	577.679	447.756	337.338	251.218	183.516	132.416	94.7886	67.5629	42.6581	28.9935	18.558	11.2052	6.44731	2.28214	0.954298	0.37401	0.11498	92165.8
				2048	10769.1	10752.2	10652.5	10540.3	10355.2	10134	9901.96	9640.25	9327.14	1393.1	1295.01	1191.23	1086.01	947.943	771.505	607.708	470.072	358.205	265.196	195.392	141.931	101.21	72.6713	51.4066	32.2983	21.8819	13.9185	8.59063	3.64413	1.75549	0.668009	0.10686	101104
				2049	10856.7	10736.8	10719.8	10620.4	10465.8	10250	9998.78	9706.19	9415.1	9053.41	1344.74	1240.93	1136.43	989.536	809.317	641.872	494.508	376.058	281.601	206.264	151.116	108.483	77.5942	55.2933	38.9221	24.3761	16.4114	10.6708	4.85558	2.80318	1.22884	0.19086	109836
				2050	10937.9	10824.2	10704.5	10687.5	10545.3	10359.5	10113.2	9801.1	9479.5	9138.79	8739.13	1288.58	1183.84	1035.48	844.827	673.33	522.307	395.606	295.636	219.023	159.524	115.503	83.17	59.0391	41.865	29.3752	18.2821	12.5821	6.03134	3.73506	1.96223	0.351098	118321
				EV car miles (billions)
				Year/age	0	1	2	3	4	5	6	7	8	9	10	11	12	13	14	15	16	17	18	19	20	21	22	23	24	25	26	27	28	29	30	31	Total
				2018	1.3219	0.715932	0.745234	0.5899	0.99556	0.570747	0.236811	0.183419	0.00272713	0.00180641	0.00128063	0.00036579	0.000317048	0.000148062	0.000254642	0.000506948	0.000523445	0.00146768	0.00242106	0.00237041	0.00283769	0	0	0	0	0	0	0	0	0	0	0	5.37653
				2019	2.43172	1.27871	0.692603	0.721043	0.568539	0.956732	0.546872	0.225501	0.174086	0.00257362	0.00169616	0.00119436	0.000339853	0.000281543	0.000123293	0.00020681	0.00040307	0.000409583	0.00112977	0.001846	0.00179947	0.00213178	0	0	0	0	0	0	0	0	0	0	7.60994
				2020	3.88299	2.35226	1.23704	0.670121	0.694934	0.546365	0.916711	0.520753	0.214027	0.164287	0.00241653	0.00158189	0.00110968	0.000301794	0.000234445	0.000100134	0.000164433	0.000315392	0.000315283	0.00086142	0.00140136	0.00135183	0.00160865	0	0	0	0	0	0	0	0	0	11.2112
				2021	5.17383	3.75611	2.27561	1.19688	0.645855	0.66783	0.52351	0.872929	0.494258	0.20198	0.154259	0.00225374	0.00146973	0.000985406	0.000251308	0.000190407	7.96156e-05	0.000128665	0.000242779	0.000240395	0.000653935	0.00105276	0.00102009	0.0012065	0	0	0	0	0	0	0	0	15.9728
				2022	6.42667	5.00477	3.63371	2.20174	1.15354	0.620666	0.639894	0.498507	0.828515	0.466436	0.189652	0.143868	0.00209394	0.00130514	0.000820562	0.000204102	0.000151391	6.22972e-05	9.90419e-05	0.000185112	0.000182492	0.000491262	0.000794413	0.00076508	0.000901859	0	0	0	0	0	0	0	21.816
				2023	7.57775	6.21667	4.84168	3.51576	2.12202	1.10855	0.594703	0.609333	0.473143	0.781878	0.437966	0.176875	0.133667	0.00185944	0.0010868	0.000666428	0.00016228	0.000118459	4.79543e-05	7.55168e-05	0.000140525	0.000137096	0.000370707	0.000595818	0.000571897	0.000680649	0	0	0	0	0	0	28.5965
				2024	8.44149	7.33014	6.01409	4.68452	3.38845	2.03925	1.06218	0.5663	0.57833	0.44651	0.734154	0.408462	0.164334	0.118698	0.00154838	0.00088266	0.000529871	0.00012698	9.11861e-05	3.65639e-05	5.73275e-05	0.000105568	0.000103453	0.000278034	0.000445374	0.00043162	0.000510486	0	0	0	0	0	35.982
				2025	10.1727	8.16565	7.09127	5.81887	4.51489	3.25629	1.95395	1.01145	0.537487	0.545776	0.419256	0.684696	0.3795	0.145931	0.0988411	0.00125754	0.000701795	0.00041461	9.7745e-05	6.95269e-05	2.7757e-05	4.30667e-05	7.96619e-05	7.75905e-05	0.00020783	0.000336131	0.000323715	0.000391373	0	0	0	0	44.8006
				2026	10.9418	9.84027	7.89956	6.86109	5.60816	4.3388	3.12008	1.86063	0.95999	0.507232	0.512463	0.391012	0.636148	0.337	0.121518	0.0802749	0.000999856	0.000549137	0.000319153	7.4528e-05	5.27804e-05	2.08521e-05	3.24982e-05	5.97472e-05	5.79988e-05	0.000156853	0.000252098	0.000248182	0.000221211	0	0	0	54.0191
				2027	11.6831	10.5843	9.51961	7.64314	6.61264	5.38943	4.15731	2.97107	1.76596	0.905952	0.476271	0.477941	0.363288	0.564907	0.280625	0.0986925	0.0638258	0.000782362	0.000422708	0.000243346	5.65768e-05	3.96507e-05	1.5735e-05	2.4374e-05	4.4661e-05	4.37727e-05	0.00011764	0.000193275	0.000140277	0.000170162	0	0	63.5603
				2028	12.5226	11.3013	10.2394	9.21061	7.36637	6.35474	5.16399	3.95875	2.8199	1.66656	0.850655	0.444187	0.444052	0.322604	0.470406	0.227912	0.0784695	0.0499421	0.000602237	0.000322303	0.000184733	4.25028e-05	2.99205e-05	1.18015e-05	1.82195e-05	3.37064e-05	3.28295e-05	9.01905e-05	0.000109243	0.000107905	0.000119113	0	73.4941
				2029	13.3329	12.1134	10.933	9.90701	8.87708	7.07907	6.08891	4.91736	3.75733	2.66117	1.56483	0.793349	0.412692	0.394324	0.268637	0.382045	0.181211	0.0614004	0.0384438	0.000459189	0.000244672	0.000138778	3.20726e-05	2.24407e-05	8.82157e-06	1.37506e-05	2.52798e-05	2.51693e-05	5.09772e-05	8.40328e-05	7.55336e-05	3.40324e-05	83.7654
				2030	14.0748	12.8973	11.7187	10.5781	9.54827	8.53086	6.78295	5.79811	4.66717	3.54583	2.49874	1.45942	0.737097	0.366475	0.328359	0.218176	0.303761	0.141793	0.047264	0.0293123	0.000348587	0.000183807	0.000104722	2.40548e-05	1.67744e-05	6.65779e-06	1.03129e-05	1.93812e-05	1.42261e-05	3.92133e-05	5.88229e-05	2.1581e-05	94.2733
				2031	14.9454	13.6149	12.477	11.3383	10.1951	9.17587	8.17401	6.459	5.50311	4.40445	3.32941	2.33041	1.35594	0.654551	0.305169	0.26668	0.17347	0.237685	0.109148	0.0360375	0.022252	0.000261872	0.000138701	7.85429e-05	1.7981e-05	1.26599e-05	4.99334e-06	7.90659e-06	1.09546e-05	1.09432e-05	2.74493e-05	1.68066e-05	105.108
				2032	15.6903	14.4571	13.1712	12.072	10.9277	9.79747	8.79204	7.78362	6.13037	5.19334	4.13562	3.10512	2.16517	1.20409	0.545054	0.247846	0.212035	0.135736	0.182962	0.0832222	0.0273574	0.0167166	0.000197609	0.000104027	5.87108e-05	1.35705e-05	9.49494e-06	3.82823e-06	4.46894e-06	8.4266e-06	7.66022e-06	7.84265e-06	116.076
				2033	16.5059	15.1776	13.9859	12.7437	11.6348	10.5015	9.38763	8.37213	7.38759	5.78529	4.87635	3.85701	2.88495	1.9227	1.00266	0.442671	0.19706	0.165912	0.104485	0.139504	0.0631769	0.020552	0.0126144	0.000148209	7.77603e-05	4.431e-05	1.01779e-05	7.27945e-06	2.16378e-06	3.43765e-06	5.89862e-06	2.18864e-06	127.172
				2034	17.4338	15.9666	14.683	13.532	12.2822	11.1811	10.0622	8.93928	7.94616	6.97175	5.43217	4.54785	3.58353	2.56187	1.60106	0.814322	0.351964	0.154195	0.127714	0.079667	0.105902	0.047461	0.0155085	0.00946092	0.000110786	5.86871e-05	3.32325e-05	7.80306e-06	4.11447e-06	1.66445e-06	2.40635e-06	1.68532e-06	138.431
				2035	18.2883	16.8642	15.4463	14.2064	13.042	11.8032	10.7133	9.58165	8.48445	7.49887	6.54621	5.06622	4.22538	3.18222	2.1333	1.30031	0.64746	0.275403	0.118694	0.0973782	0.0604781	0.079558	0.0358142	0.0116316	0.00707203	8.36121e-05	4.40153e-05	2.54783e-05	4.41042e-06	3.16498e-06	1.16511e-06	6.87529e-07	149.716
				2036	19.0907	17.6907	16.3146	14.9449	13.692	12.5333	11.3094	10.2017	9.09414	8.00686	7.04116	6.10521	4.707	3.75219	2.64988	1.73259	1.03387	0.506621	0.211996	0.090501	0.0739233	0.0454335	0.0600346	0.026861	0.00869459	0.00533738	6.27091e-05	3.37451e-05	1.44008e-05	3.39263e-06	2.21549e-06	3.3289e-07	160.93
				2037	19.977	18.4669	17.1142	15.785	14.4037	13.158	12.009	10.7693	9.68262	8.58223	7.51815	6.56682	5.67232	4.17988	3.1245	2.15213	1.37756	0.808975	0.38998	0.161641	0.0687026	0.0555341	0.0342842	0.0450266	0.0200786	0.00656195	0.00400304	4.8077e-05	1.90733e-05	1.10775e-05	2.37484e-06	6.32996e-07	172.134
				2038	20.8104	19.3242	17.8651	16.5587	15.2135	13.842	12.6076	11.4355	10.2214	9.13759	8.05839	7.01168	6.1012	5.03709	3.48064	2.5376	1.71114	1.07791	0.622723	0.297349	0.122708	0.0516121	0.0419061	0.0257135	0.0336573	0.0151536	0.00492146	0.00306899	2.71739e-05	1.46718e-05	7.75425e-06	6.78527e-07	183.25
				2039	21.6096	20.1304	18.6945	17.2852	15.9591	14.6201	13.2629	12.0054	10.8536	9.64601	8.57985	7.51553	6.51451	5.41794	4.19446	2.82684	2.01762	1.33892	0.829738	0.474809	0.225728	0.0921828	0.0389466	0.03143	0.0192208	0.0254018	0.0113652	0.00377312	0.00173465	2.0903e-05	1.02702e-05	2.2155e-06	194.227
				2040	140.435	20.9035	19.4744	18.0877	16.6593	15.3366	14.0085	12.6295	11.3946	10.2427	9.05724	8.00186	6.98264	5.78497	4.5116	3.40657	2.24759	1.57874	1.03066	0.632653	0.360445	0.169576	0.0695613	0.0292103	0.0234939	0.0145063	0.0190513	0.00871334	0.00213263	0.00133435	1.46321e-05	2.93435e-06	323.105
				2041	141.76	135.846	20.2223	18.8423	17.4327	16.0096	14.6951	13.3395	11.9869	10.7532	9.61751	8.44709	7.43449	6.20067	4.81722	3.66414	2.70854	1.75869	1.21526	0.785849	0.480269	0.27078	0.127962	0.0521717	0.0218347	0.0177313	0.0108797	0.014606	0.00492493	0.00164049	0.000934042	4.18061e-06	448.541
				2042	142.729	137.127	131.419	19.5659	18.16	16.7528	15.3399	13.9933	12.6608	11.3122	10.0969	8.96961	7.84815	6.60191	5.16338	3.91236	2.91332	2.11936	1.35378	0.926603	0.596566	0.360797	0.204331	0.0959732	0.0389983	0.016479	0.0132984	0.00834111	0.00825557	0.00378841	0.00114834	0.000266869	570.314
				2043	144.125	138.065	132.659	127.154	18.8574	17.4517	16.052	14.6073	13.2813	11.9481	10.6217	9.41666	8.33362	6.96925	5.49751	4.1935	3.11068	2.2796	1.63141	1.03222	0.703417	0.448164	0.272258	0.153251	0.0717399	0.0294327	0.0123593	0.0101955	0.00471454	0.00635044	0.00265189	0.000328098	689.001
				2044	145.774	139.415	133.566	128.353	122.549	18.1219	16.7217	15.2854	13.864	12.5337	11.2188	9.90616	8.74898	7.40036	5.80339	4.46486	3.33421	2.43403	1.75476	1.24391	0.783595	0.528435	0.338185	0.204197	0.114555	0.0541433	0.0220745	0.00947543	0.00576266	0.00362657	0.00444531	0.000757682	804.563
				2045	147.331	141.01	134.872	129.231	123.705	117.77	17.3639	15.9231	14.5077	13.0836	11.7687	10.4631	9.20376	7.7692	6.16238	4.71329	3.54997	2.60894	1.87364	1.33796	0.944296	0.588667	0.398758	0.253642	0.152637	0.0864564	0.0406075	0.0169238	0.00535568	0.00443281	0.0025386	0.00127009	916.743
				2046	148.45	142.516	136.415	130.494	124.551	118.88	112.843	16.5346	15.1129	13.691	12.285	10.9759	9.72117	8.17306	6.46952	5.00484	3.74749	2.77776	2.00827	1.4286	1.01569	0.709392	0.444209	0.299073	0.189598	0.115198	0.0648423	0.0311324	0.00956563	0.00411975	0.00310297	0.000725314	1024.97
				2047	149.389	143.599	137.872	131.987	125.769	119.693	113.907	107.454	15.6933	14.2622	12.8554	11.4574	10.1976	8.63252	6.80582	5.25429	3.9793	2.93232	2.13823	1.53125	1.0845	0.763029	0.535309	0.333162	0.223556	0.143092	0.0863982	0.0497124	0.0175966	0.00735817	0.00288383	0.000886563	1128.66
				2048	149.174	144.507	138.92	133.397	127.208	120.864	114.687	108.467	101.987	14.8099	13.3917	11.9894	10.6451	9.0556	7.18842	5.52742	4.17764	3.1137	2.2572	1.63034	1.16243	0.814718	0.575783	0.401487	0.249038	0.168722	0.107319	0.0662386	0.0280983	0.0135358	0.00515072	0.000823951	1226.59
				2049	150.388	144.3	139.798	134.41	128.566	122.247	115.808	109.209	102.948	96.2458	13.906	12.4895	11.1393	9.45294	7.54073	5.83815	4.3948	3.2689	2.39683	1.72106	1.23765	0.873263	0.614788	0.431843	0.300111	0.187953	0.126541	0.0822782	0.0374392	0.0216141	0.00947508	0.00147163	1319.99
				2050	151.513	145.474	139.597	135.26	129.543	123.552	117.133	110.277	103.653	97.1535	90.3712	12.9692	11.604	9.89179	7.87159	6.12428	4.64186	3.43882	2.51629	1.82752	1.30651	0.929772	0.658966	0.461097	0.322802	0.226499	0.140965	0.0970151	0.0465051	0.0287994	0.0151299	0.00270717	1408.65

## Sheet: EV light truck stock and miles
				truck survival curve	1	0.991	0.990918	0.990835	0.986639	0.980208	0.976621	0.969532	0.964085	0.958091	0.952612	0.945153	0.940621	0.934003	0.929339	0.91405	0.907776	0.90239	0.898455	0.894349	0.89011	0.888889	0.885417	0.882353	0.88	0.878788	0.87931	0.869281	0.879699	0.871795	0.872549	0.303371
				2018 LT EV A age dist (VISION18)		0.401338	0.401195	0.0140503	0.0833933	0	0	0	0.0251103	0.0197775	0.00502983	0.00434339	0.00407701	0.00294678	0.00269892	0.00259589	0.00976252	0.00639409	0.00655652	0.00515694	0.00475323	0.000821454	0	0	0	0	0	0	0	0	0	0
				2018 LT EV A annual miles dist (VISION18)	15300.3	14798.1	14311.4	13840.1	13384.3	12944	12519.2	12109.8	11715.9	11337.5	10974.6	10627.2	10295.2	9978.73	9677.71	9392.18	9122.12	8867.53	8628.43	8404.8	8196.65	8003.97	7826.78	7665.06	7518.81	7518.81	7518.81	7518.81	7518.81	7518.81	7518.81	7518.81
				EV truck stock (thousands)
				Year/age	0	1	2	3	4	5	6	7	8	9	10	11	12	13	14	15	16	17	18	19	20	21	22	23	24	25	26	27	28	29	30	31	Total
				2018	15.1371	11.2852	11.2812	0.395079	2.34493	0	0	0	0.706073	0.556121	0.141433	0.122131	0.114641	0.0828602	0.0758907	0.0729938	0.274512	0.179795	0.184362	0.145008	0.133656	0.0230984	0	0	0	0	0	0	0	0	0	0	43.256
				2019	26.9099	15.0008	11.1827	11.1778	0.389801	2.29852	0	0	0	0.676482	0.529768	0.133676	0.114879	0.107075	0.0770053	0.0693679	0.066262	0.247717	0.161537	0.164884	0.129073	0.118805	0.0204517	0	0	0	0	0	0	0	0	0	69.5765
				2020	48.8288	26.6678	14.8646	11.0802	11.0284	0.382086	2.24478	0	0	0	0.644425	0.500712	0.125739	0.107298	0.0995092	0.0703867	0.0629705	0.0597942	0.222562	0.144471	0.146765	0.114731	0.105192	0.0180456	0	0	0	0	0	0	0	0	117.519
				2021	69.4708	48.3893	26.4256	14.7284	10.9322	10.8102	0.373153	2.17639	0	0	0	0.609081	0.47098	0.11744	0.099716	0.0909564	0.0638953	0.056824	0.0537223	0.199048	0.128595	0.130458	0.101585	0.0928164	0.0158802	0	0	0	0	0	0	0	185.537
				2022	83.4998	68.8455	47.9499	26.1834	14.5316	10.7158	10.5574	0.361784	2.09822	0	0	0	0.572914	0.439897	0.109142	0.0911453	0.082568	0.0576585	0.0510538	0.0480465	0.177175	0.114307	0.115509	0.0896339	0.0816784	0.0139553	0	0	0	0	0	0	266.788
				2023	94.625	82.7483	68.2203	47.5104	25.8335	14.244	10.4653	10.2358	0.34879	2.01029	0	0	0	0.535103	0.408813	0.0997611	0.0827395	0.0745086	0.0518036	0.0456599	0.0427667	0.157489	0.101209	0.10192	0.0788778	0.071778	0.012271	0	0	0	0	0	358.106
				2024	112.554	93.7734	81.9968	67.5951	46.8756	25.3223	13.911	10.1464	9.86814	0.334173	1.91503	0	0	0	0.497293	0.373676	0.0905607	0.0746634	0.0669426	0.0463305	0.0406423	0.0380148	0.139443	0.0893021	0.0896897	0.0693168	0.0631151	0.010667	0	0	0	0	465.981
				2025	130.361	111.541	92.9218	81.2453	66.6919	45.9479	24.7302	13.4871	9.78201	9.45457	0.318337	1.80999	0	0	0	0.45455	0.339214	0.0817211	0.0670817	0.05987	0.0412392	0.0361265	0.033659	0.123038	0.0785858	0.0788182	0.060951	0.0548648	0.00938373	0	0	0	589.81
				2026	130.147	129.188	110.528	92.0702	80.1598	65.372	44.8737	23.9768	13.0028	9.37205	9.00654	0.300877	1.70252	0	0	0	0.41263	0.306103	0.0734227	0.0599944	0.0532909	0.0366571	0.031987	0.0296991	0.108274	0.0690603	0.0693057	0.0529836	0.0482645	0.00818069	0	0	711.06
				2027	127.007	128.976	128.015	109.515	90.84	78.5733	63.8436	43.5064	23.1156	12.4578	8.92793	8.51256	0.283012	1.59015	0	0	0	0.372353	0.27502	0.0656655	0.0534016	0.0473697	0.0324568	0.0282238	0.0261352	0.0951494	0.0607254	0.0602461	0.0466096	0.0420768	0.00713805	0	826.376
				2028	127.443	125.864	127.805	126.842	108.051	89.0422	76.7363	61.8985	41.9439	22.1469	11.8675	8.43826	8.00709	0.264334	1.47779	0	0	0	0.334542	0.245964	0.0584495	0.0474681	0.0419419	0.0286383	0.024837	0.0229673	0.0836659	0.0527874	0.0529985	0.040634	0.036714	0.00216548	938.901
				2029	129.291	126.296	124.721	126.633	125.147	105.913	86.9604	74.3983	59.6754	40.1861	21.0974	11.2166	7.9372	7.47865	0.245656	1.35078	0	0	0	0.299198	0.218935	0.0519552	0.042029	0.0370076	0.0252017	0.0218264	0.0201954	0.0727292	0.0464371	0.0462038	0.0354552	0.011138	1049.47
				2030	130.587	128.127	125.149	123.578	124.941	122.67	103.437	84.3109	71.7263	57.1745	38.2818	19.9403	10.5505	7.41337	6.9502	0.224541	1.2262	0	0	0	0.266319	0.194609	0.046002	0.0370845	0.0325667	0.022147	0.0191922	0.0175555	0.0639798	0.0404836	0.0403151	0.0107561	1157.08
				2031	131.717	129.412	126.963	124.002	121.927	122.469	119.802	100.285	81.2829	68.7203	54.4651	36.1821	18.7562	9.85424	6.88954	6.35283	0.203833	1.10651	0	0	0	0.236728	0.17231	0.04059	0.0326343	0.0286192	0.0194741	0.0166834	0.0154435	0.0557773	0.0353239	0.0122304	1261.06
				2032	133.412	130.531	128.237	125.8	122.345	119.514	119.605	116.152	96.6835	77.8764	65.4639	51.4778	34.0337	17.5184	9.15793	6.29738	5.76695	0.183937	0.994152	0	0	0	0.209603	0.152038	0.0357192	0.0286786	0.0251651	0.0169284	0.0146764	0.0134636	0.0486684	0.0107162	1361.61
				2033	134.835	132.211	129.346	127.062	124.119	119.923	116.72	115.961	111.98	92.6316	74.186	61.8734	48.4211	31.7875	16.2805	8.37081	5.71661	5.20404	0.165259	0.889119	0	0	0	0.184944	0.133793	0.0313896	0.0252174	0.0218756	0.0148919	0.0127948	0.0117476	0.0147646	1458.14
				2034	136.86	133.622	131.011	128.16	125.364	121.662	117.12	113.163	111.796	107.287	88.242	70.1171	58.1994	45.2255	29.5414	14.8812	7.59882	5.15861	4.67559	0.147799	0.791413	0	0	0	0.16275	0.117576	0.0276012	0.021921	0.0192439	0.0129827	0.0111641	0.00356389	1551
				2035	138.211	135.628	132.408	129.81	126.448	122.883	118.818	113.551	109.099	107.111	102.203	83.4022	65.9536	54.3584	42.0298	27.0023	13.5088	6.8571	4.63478	4.18161	0.131558	0.703479	0	0	0	0.143023	0.103386	0.0239932	0.0192839	0.0167768	0.0113281	0.00338686	1639.26
				2036	140.063	136.968	134.397	131.195	128.076	123.946	120.01	115.198	109.473	104.527	102.035	96.5977	78.4499	61.6009	50.5174	38.4173	24.512	12.1902	6.16079	4.14511	3.72209	0.11694	0.622872	0	0	0	0.125762	0.0898714	0.0211068	0.0168116	0.0146385	0.0034366	1723.21
				2037	141.804	138.803	135.724	133.165	129.442	125.541	121.048	116.353	111.061	104.885	99.5737	96.4391	90.8618	73.2724	57.2481	46.1754	34.8743	22.1194	10.9523	5.5099	3.6896	3.30853	0.103541	0.549593	0	0	0	0.109322	0.0790598	0.0184008	0.014669	0.00444091	1802.73
				2038	142.828	140.528	137.542	134.48	131.386	126.88	122.606	117.36	112.175	106.406	99.915	94.1124	90.7126	84.8652	68.0949	52.3276	41.9169	31.4703	19.8733	9.79522	4.90441	3.27965	2.92942	0.0913595	0.483642	0	0	0	0.0961706	0.0689239	0.0160556	0.00445013	1877.15
				2039	144.023	141.542	139.252	136.282	132.683	128.785	123.914	118.87	113.145	107.473	101.364	94.4349	88.524	84.7258	78.8686	62.2421	47.5018	37.8254	28.2746	17.7737	8.71882	4.35948	2.90386	2.58479	0.0803964	0.425018	0	0	0	0.0838411	0.0601395	0.0048708	1946.72
				2040	6742.12	142.727	140.257	137.975	134.461	130.057	125.774	120.138	114.601	108.403	102.381	95.8043	88.8275	82.6817	78.739	72.0898	56.5019	42.8651	33.9844	25.2874	15.8205	7.75006	3.85996	2.56223	2.27461	0.0706514	0.373723	0	0	0	0.0731554	0.0182446	8608.48
				2041	6782.2	6681.44	141.431	138.971	136.132	131.8	127.016	121.942	115.824	109.798	103.266	96.7653	90.1155	82.9651	76.8394	71.9714	65.4414	50.9868	38.5124	30.3939	22.5085	14.0627	6.86203	3.40584	2.25476	1.9989	0.0621245	0.32487	0	0	0	0.0221932	15245.3
				2042	6809.05	6721.16	6620.76	140.135	137.115	133.438	128.718	123.146	117.563	110.969	104.595	97.6022	91.0195	84.1681	77.1028	70.235	65.3339	59.0537	45.8093	34.4435	27.0539	20.0076	12.4513	6.05474	2.99714	1.98145	1.75765	0.0540036	0.285788	0	0	0	21844.1
				2043	6866.25	6747.77	6660.12	6560.09	138.262	134.401	130.318	124.796	118.724	112.636	105.711	98.8584	91.8066	85.0124	78.2208	70.4757	63.7576	58.9567	53.057	40.9695	30.6585	24.0479	17.715	10.9865	5.32817	2.63385	1.74231	1.5279	0.047507	0.249149	0	0	28435.1
				2044	6939.29	6804.46	6686.49	6599.08	6472.44	135.526	131.259	126.347	120.314	113.748	107.298	99.9129	92.9882	85.7476	79.0054	71.4977	63.9762	57.5343	52.9699	47.4515	36.4674	27.252	21.2925	15.6309	9.6681	4.68233	2.31597	1.51456	1.34409	0.0414163	0.217394	0	35007.8
				2045	7010.14	6876.84	6742.66	6625.21	6510.91	6344.34	132.357	127.26	121.81	115.272	108.358	101.413	93.9802	86.8513	79.6887	72.2149	64.9038	57.7315	51.6919	47.3736	42.2371	32.4154	24.1294	18.7875	13.7552	8.49621	4.11722	2.01323	1.33236	1.17177	0.0361378	0.0659511	41519.6
				2046	7089.11	6947.05	6814.38	6680.86	6536.69	6382.05	6196.01	128.325	122.689	116.705	109.81	102.415	95.3914	87.7778	80.7143	72.8394	65.5549	58.5686	51.8691	46.2306	42.1677	37.544	28.7012	21.2906	16.533	12.0879	7.4708	3.57902	1.77104	1.16154	1.02243	0.0109631	47958.4
				2047	7143.58	7025.31	6883.96	6751.93	6591.6	6407.32	6232.84	6007.23	123.716	117.547	111.174	103.787	96.3334	89.0959	81.5753	73.7769	66.1218	59.1561	52.6212	46.3891	41.1503	37.4824	33.2421	25.3246	18.7358	14.529	10.629	6.49423	3.14846	1.54398	1.0135	0.310174	54258.7
				2048	7135.78	7079.29	6961.51	6820.87	6661.72	6461.14	6257.52	6042.94	5791.48	118.531	111.977	105.077	97.6241	89.9757	82.8003	74.5639	66.9729	59.6677	53.1491	47.0618	41.2914	36.5781	33.1875	29.3313	22.2856	16.4648	12.7755	9.23961	5.71297	2.74481	1.3472	0.307467	60330.9
				2049	7215.92	7071.56	7014.99	6897.7	6729.74	6529.87	6310.09	6066.87	5825.91	5548.77	112.914	105.835	98.8374	91.1812	83.6179	75.6836	67.6873	60.4357	53.6087	47.5338	41.8901	36.7035	32.3868	29.2831	25.8115	19.5843	14.4776	11.1055	8.12808	4.98054	2.39498	0.408701	66235.9
				2050	7287.36	7150.97	7007.34	6950.7	6805.55	6596.54	6377.21	6117.83	5848.98	5581.75	5285.82	106.721	99.5509	92.3144	84.7383	76.4309	68.7037	61.0804	54.2987	47.9449	42.3103	37.2357	32.4979	28.5766	25.7691	22.6829	17.2207	12.5851	9.76948	7.08602	4.34576	0.726568	71942.6
				EV truck miles (billions)
				Year/age	0	1	2	3	4	5	6	7	8	9	10	11	12	13	14	15	16	17	18	19	20	21	22	23	24	25	26	27	28	29	30	31	Total
				2018	0.231602	0.166999	0.161449	0.00546793	0.0313853	0	0	0	0.00827232	0.00630505	0.00155218	0.00129791	0.00118026	0.00082684	0.000734449	0.00068557	0.00250413	0.00159434	0.00159076	0.00121876	0.00109553	0.000184879	0	0	0	0	0	0	0	0	0	0	0.625946
				2019	0.41173	0.221984	0.160039	0.154701	0.00521721	0.029752	0	0	0	0.00766965	0.00581401	0.0014206	0.00118271	0.00106847	0.000745235	0.000651515	0.000604449	0.00219664	0.00139381	0.00138582	0.00105796	0.000950912	0.000160071	0	0	0	0	0	0	0	0	0	1.00973
				2020	0.747095	0.394632	0.212733	0.153351	0.147608	0.00494572	0.0281028	0	0	0	0.00707233	0.00532116	0.00129451	0.00107069	0.000963022	0.000661084	0.000574424	0.000530227	0.00192036	0.00121425	0.00120298	0.000918307	0.000823313	0.000138321	0	0	0	0	0	0	0	0	1.71217
				2021	1.06292	0.71607	0.378186	0.203842	0.146319	0.139927	0.00467157	0.0263557	0	0	0	0.00647281	0.00484884	0.0011719	0.000965023	0.000854278	0.00058286	0.000503888	0.000463539	0.00167296	0.00105405	0.00104418	0.000795083	0.000711443	0.0001194	0	0	0	0	0	0	0	2.69956
				2022	1.27757	1.01878	0.686228	0.36238	0.194495	0.138705	0.13217	0.00438114	0.0245827	0	0	0	0.00589827	0.00438961	0.00105624	0.000856053	0.000753195	0.000511289	0.000440514	0.000403821	0.00145224	0.000914907	0.000904067	0.000687049	0.000614125	0.000104927	0	0	0	0	0	0	3.85828
				2023	1.44779	1.22452	0.976325	0.657549	0.345764	0.184374	0.131017	0.123953	0.00408641	0.0227917	0	0	0	0.00533965	0.00395638	0.000936974	0.00075476	0.000660707	0.000446983	0.000383762	0.000350543	0.00126054	0.00079214	0.000781223	0.000593067	0.000539685	9.22636e-05	0	0	0	0	0	5.13506
				2024	1.7221	1.38767	1.17349	0.935522	0.627398	0.327771	0.174154	0.122871	0.115615	0.0037887	0.0210167	0	0	0	0.00481265	0.00350963	0.000826105	0.00066208	0.000577609	0.000389398	0.000333131	0.00030427	0.00109139	0.000684505	0.00067436	0.00052118	0.000474551	8.0203e-05	0	0	0	0	6.62634
				2025	1.99457	1.65059	1.32984	1.12444	0.892626	0.59475	0.309602	0.163327	0.114605	0.107192	0.00349363	0.0192351	0	0	0	0.00426921	0.00309435	0.000724665	0.000578809	0.000503196	0.000338023	0.000289156	0.000263441	0.000943094	0.000590872	0.000592619	0.000458279	0.000412518	7.05545e-05	0	0	0	8.3174
				2026	1.99129	1.91174	1.5818	1.27426	1.07288	0.846176	0.561781	0.290354	0.15234	0.106256	0.0988435	0.00319748	0.0175278	0	0	0	0.00376406	0.00271438	0.000633523	0.000504241	0.000436807	0.000293402	0.000250355	0.000227645	0.000814088	0.000519251	0.000521096	0.000398374	0.000362892	6.1509e-05	0	0	9.91995
				2027	1.94325	1.9086	1.83207	1.51569	1.21583	1.01705	0.79927	0.526855	0.270822	0.141241	0.0979807	0.0904646	0.00291367	0.0158677	0	0	0	0.00330185	0.00237299	0.000551906	0.000437714	0.000379146	0.000254032	0.000216337	0.000196506	0.000715411	0.000456583	0.000452979	0.000350449	0.000316367	5.36697e-05	0	11.388
				2028	1.94991	1.86255	1.82906	1.7555	1.44619	1.15256	0.960676	0.74958	0.491413	0.251091	0.130241	0.089675	0.0824348	0.00263771	0.0143017	0	0	0	0.00288657	0.00206728	0.00047909	0.000379933	0.00032827	0.000219514	0.000186744	0.000172687	0.000629068	0.000396899	0.000398485	0.00030552	0.000276046	1.62818e-05	12.7766
				2029	1.97818	1.86893	1.78493	1.75262	1.675	1.37094	1.08867	0.900951	0.699154	0.455612	0.231536	0.119201	0.0817152	0.0746274	0.00237738	0.0126867	0	0	0	0.0025147	0.00179453	0.000415848	0.000328952	0.000283665	0.000189487	0.000164109	0.000151845	0.000546837	0.000349152	0.000347398	0.000266581	8.37443e-05	14.1046
				2030	1.99803	1.89603	1.79105	1.71033	1.67225	1.58784	1.29494	1.02099	0.840342	0.648218	0.420128	0.211909	0.10862	0.073976	0.0672621	0.00210893	0.0111856	0	0	0	0.00218292	0.00155764	0.000360047	0.000284254	0.000244863	0.000166519	0.000144303	0.000131996	0.000481052	0.000304389	0.000303121	8.08728e-05	15.3615
				2031	2.01531	1.91505	1.81702	1.71619	1.63191	1.58523	1.49982	1.21444	0.952306	0.77912	0.597734	0.384514	0.193099	0.0983328	0.066675	0.0596669	0.00185939	0.00981204	0	0	0	0.00189476	0.00134863	0.000311124	0.000245371	0.000215182	0.000146422	0.000125439	0.000116117	0.000419379	0.000265594	9.19582e-05	16.5433
				2032	2.04125	1.93162	1.83524	1.74108	1.6375	1.54699	1.49736	1.40658	1.13274	0.882928	0.718441	0.547065	0.350384	0.174811	0.0886279	0.0591461	0.0526067	0.00163107	0.00857797	0	0	0	0.00164051	0.00116538	0.000268566	0.000215629	0.000189212	0.000127282	0.000110349	0.00010123	0.000365929	8.05734e-05	17.6588
				2033	2.06302	1.95648	1.85112	1.75854	1.66125	1.55229	1.46123	1.40427	1.31196	1.05022	0.814164	0.65754	0.498506	0.317199	0.157558	0.0786201	0.0521476	0.046147	0.00142593	0.00747287	0	0	0	0.0014176	0.00100597	0.000236012	0.000189605	0.000164478	0.00011197	9.62017e-05	8.83283e-05	0.000111012	18.7046
				2034	2.094	1.97735	1.87494	1.77375	1.67791	1.5748	1.46624	1.37039	1.3098	1.21638	0.968423	0.745148	0.599175	0.451293	0.285893	0.139767	0.0693173	0.0457442	0.040343	0.00124222	0.00648694	0	0	0	0.00122369	0.000884032	0.000207528	0.00016482	0.000144692	9.76146e-05	8.39407e-05	2.67962e-05	19.6912
				2035	2.11468	2.00704	1.89494	1.79658	1.69242	1.5906	1.4875	1.37509	1.2782	1.21438	1.12164	0.886331	0.679007	0.542427	0.406753	0.253611	0.123229	0.0608056	0.0399909	0.0351456	0.00107833	0.00563062	0	0	0	0.00107536	0.000777339	0.0001804	0.000144992	0.000126141	8.51735e-05	2.54652e-05	20.6095
				2036	2.14301	2.02686	1.9234	1.81575	1.7142	1.60435	1.50242	1.39503	1.28258	1.18508	1.1198	1.02656	0.807658	0.614698	0.488893	0.360822	0.223602	0.108097	0.053158	0.0348388	0.0305087	0.000935986	0.00487508	0	0	0	0.000945578	0.000675726	0.000158698	0.000126403	0.000110065	2.58392e-05	21.4692
				2037	2.16965	2.05402	1.94239	1.84301	1.73249	1.625	1.51542	1.40902	1.30118	1.18914	1.09278	1.02488	0.935442	0.731165	0.554031	0.433687	0.318128	0.196145	0.0945015	0.0463096	0.0302424	0.0264814	0.000810391	0.00421266	0	0	0	0.000821973	0.000594436	0.000138352	0.000110293	3.33904e-05	22.2718
				2038	2.18531	2.07954	1.96842	1.86121	1.75851	1.64234	1.53492	1.42121	1.31423	1.20638	1.09653	1.00015	0.933906	0.846846	0.659003	0.49147	0.382371	0.279064	0.171475	0.0823269	0.0401998	0.0262502	0.022928	0.000700276	0.00363641	0	0	0	0.000723089	0.000518226	0.000120719	3.34597e-05	23.0103
				2039	2.2036	2.09456	1.99288	1.88615	1.77587	1.667	1.5513	1.4395	1.3256	1.21849	1.11243	1.00358	0.911374	0.845456	0.763267	0.584589	0.433317	0.335418	0.243965	0.149384	0.0714651	0.0348932	0.0227278	0.0198125	0.000604485	0.00319563	0	0	0	0.000630385	0.000452178	3.66226e-05	23.6915
				2040	103.157	2.11209	2.00727	1.90959	1.79967	1.68346	1.57459	1.45485	1.34266	1.22902	1.12359	1.01813	0.914498	0.825058	0.762014	0.67708	0.515417	0.380108	0.293232	0.212535	0.129675	0.0620313	0.030211	0.0196396	0.0171024	0.000531214	0.00280995	0	0	0	0.000550042	0.000137177	125.254
				2041	103.77	98.8726	2.02407	1.92338	1.82203	1.70601	1.59014	1.4767	1.35698	1.24484	1.13331	1.02834	0.927759	0.827886	0.743629	0.675968	0.596964	0.452127	0.332301	0.255455	0.184495	0.112557	0.0537076	0.026106	0.0169531	0.0150294	0.000467102	0.00244264	0	0	0	0.000166867	223.172
				2042	104.181	99.4603	94.7521	1.93948	1.83519	1.72722	1.61145	1.49128	1.37736	1.25812	1.14789	1.03724	0.937065	0.839891	0.746178	0.659659	0.595983	0.52366	0.395262	0.289491	0.221752	0.16014	0.0974539	0.0464099	0.022535	0.0148982	0.0132155	0.000406043	0.00214879	0	0	0	317.384
				2043	105.056	99.8542	95.3153	90.7922	1.85054	1.73969	1.63147	1.51126	1.39096	1.27701	1.16014	1.05059	0.945169	0.848316	0.756998	0.661921	0.581605	0.5228	0.457799	0.344341	0.251297	0.192479	0.138652	0.084212	0.0400615	0.0198034	0.0131001	0.011488	0.000357196	0.0018733	0	0	408.501
				2044	106.173	100.693	95.6927	91.3319	86.6291	1.75425	1.64325	1.53005	1.4096	1.28962	1.17756	1.06179	0.957334	0.855652	0.764592	0.671519	0.583598	0.510187	0.457047	0.39882	0.29891	0.218124	0.166651	0.119812	0.0726926	0.0352056	0.0174134	0.0113877	0.010106	0.000311402	0.00163455	0	496.537
				2045	107.257	101.764	96.4966	91.6935	87.1441	82.1211	1.657	1.54109	1.42712	1.3069	1.18919	1.07774	0.967546	0.866665	0.771204	0.678255	0.59206	0.511936	0.44602	0.398165	0.346202	0.259452	0.188855	0.144007	0.103423	0.0638814	0.0309566	0.0151371	0.0100177	0.00881032	0.000271713	0.000495874	581.079
				2046	108.466	102.803	97.523	92.4638	87.4891	82.6093	77.569	1.55399	1.43742	1.32315	1.20512	1.08838	0.982075	0.87591	0.78113	0.68412	0.597999	0.519359	0.447549	0.388559	0.345634	0.300502	0.224638	0.163194	0.124308	0.0908868	0.0561716	0.02691	0.0133161	0.00873342	0.00768743	8.24298e-05	662.17
				2047	109.299	103.961	98.5188	93.4473	88.2241	82.9364	78.03	72.7465	1.44945	1.3327	1.2201	1.10296	0.991773	0.889063	0.789463	0.692925	0.603171	0.524569	0.454039	0.389891	0.337295	0.300008	0.260179	0.194114	0.140871	0.109241	0.0799177	0.0488289	0.0236727	0.0116089	0.00762033	0.00233214	739.119
				2048	109.18	104.76	99.6286	94.4015	89.1625	83.6331	78.339	73.1789	67.8527	1.34385	1.22891	1.11667	1.00506	0.897843	0.801317	0.700317	0.610934	0.529106	0.458593	0.395545	0.338451	0.29277	0.259751	0.224826	0.167561	0.123795	0.0960564	0.0694709	0.0429547	0.0206377	0.0101293	0.00231179	810.873
				2049	110.406	104.646	100.394	95.4649	90.0729	84.5227	78.9971	73.4687	68.2561	62.9094	1.23919	1.12473	1.01755	0.909873	0.80923	0.710833	0.617452	0.535915	0.462559	0.399512	0.343359	0.293774	0.253485	0.224457	0.194072	0.147251	0.108855	0.0835	0.0611135	0.0374477	0.0180074	0.00307295	878.732
				2050	111.499	105.821	100.285	96.1984	91.0876	85.3857	79.8374	74.0859	68.5263	63.2834	58.01	1.13415	1.0249	0.921181	0.820073	0.717853	0.626723	0.541632	0.468513	0.402967	0.346803	0.298033	0.254353	0.219041	0.193753	0.170548	0.129479	0.0946252	0.0734549	0.0532785	0.032675	0.00546293	942.548

## Sheet: ICE car stock and miles
				car survival curve	1	0.997	0.996991	0.996982	0.992936	0.989837	0.986653	0.980229	0.976645	0.970652	0.965286	0.958237	0.953995	0.911168	0.85376	0.831974	0.813725	0.8	0.786145	0.777778	0.773399	0.764331	0.766667	0.76087	0.757143	0.754717	0.75	0.766667	0.565217	0.769231	0.7	0.285714
				2018 Auto ICE age dist (VISION18)		0.0786115	0.0844222	0.0691121	0.067272	0.0621473	0.0581669	0.0543257	0.0432547	0.0361993	0.0432588	0.0493278	0.0456466	0.0334595	0.0394367	0.0358943	0.034132	0.0316806	0.0294945	0.0250948	0.0204876	0.017944	0.0158073	0.0134184	0.0114054	0	0	0	0	0	0	0
				2018 Auto ICE annual miles dist (VISION18)	13852.1	13439.8	13041	12655.9	12284.4	11926.5	11582.2	11251.5	10934.4	10630.9	10341	10064.7	9801.99	9552.9	9317.4	9095.51	8887.22	8692.53	8511.44	8343.96	8190.08	8049.8	7923.12	7810.04	7710.56	7710.56	7710.56	7710.56	7710.56	7710.56	7710.56	7710.56
				ICE car stock (thousands)
				Year/age	0	1	2	3	4	5	6	7	8	9	10	11	12	13	14	15	16	17	18	19	20	21	22	23	24	25	26	27	28	29	30	31	Total
				2018	8510.16	9269.6	9954.77	8149.46	7932.48	7328.2	6858.85	6405.9	5100.44	4268.49	5100.93	5816.57	5382.49	3945.43	4650.24	4232.53	4024.73	3735.66	3477.89	2959.1	2415.83	2115.89	1863.94	1582.25	1344.89	0	0	0	0	0	0	0	126427
				2019	8348.6	8484.63	9241.71	9924.73	8091.9	7851.87	7230.39	6723.24	6256.3	4950.75	4120.31	4887.9	5548.98	4904.35	3368.45	3868.88	3444.12	3219.78	2936.77	2705.03	2288.56	1846.49	1622.18	1418.22	1197.99	1015.01	0	0	0	0	0	0	125497
				2020	8499.89	8323.55	8459.1	9213.82	9854.63	8009.66	7747.07	7087.44	6566.22	6072.69	4778.89	3948.24	4663.04	5056.05	4187.14	2802.46	3148.2	2755.29	2531.21	2284.16	2092.06	1749.22	1415.64	1234.27	1073.79	904.142	761.259	0	0	0	0	0	125219
				2021	8364.83	8474.39	8298.5	8433.57	9148.74	9754.48	7902.76	7593.9	6921.91	6373.52	5861.88	4579.31	3766.6	4248.81	4316.65	3483.59	2280.44	2518.56	2166.06	1968.72	1766.56	1599.03	1341.07	1077.12	934.518	810.41	678.107	583.632	0	0	0	0	125248
				2022	8352.41	8339.74	8448.89	8273.46	8374	9055.76	9624.28	7746.51	7416.55	6718.77	6152.26	5617.07	4368.64	3432	3627.46	3591.34	2834.69	1824.35	1979.95	1684.71	1522.61	1350.24	1225.92	1020.38	815.534	705.297	607.808	519.882	329.879	0	0	0	125560
				2023	8403.63	8327.36	8314.64	8423.39	8215.02	8288.9	8934.89	9434	7565.6	7198.89	6485.53	5895.33	5358.65	3980.56	2930.11	3017.95	2922.37	2267.75	1434.2	1539.96	1302.96	1163.78	1035.18	932.768	772.572	615.497	528.973	465.986	293.846	253.753	0	0	126304
				2024	8426.8	8378.42	8302.3	8289.55	8363.89	8131.53	8178.26	8758.24	9213.67	7343.56	6948.98	6214.68	5624.11	4882.63	3398.45	2437.77	2455.79	2337.89	1782.78	1115.49	1191.01	995.889	892.229	787.64	706.238	583.073	461.623	405.546	263.383	226.036	177.627	0	127275
				2025	8354.43	8401.52	8353.21	8277.24	8230.99	8278.89	8023	8016.57	8553.7	8943.27	7088.64	6658.77	5928.77	5124.51	4168.6	2827.42	1983.68	1964.63	1837.92	1386.61	862.719	910.324	763.515	678.87	596.356	533.01	437.305	353.911	229.221	202.603	158.225	50.7506	128179
				2026	8355.92	8329.36	8376.24	8328	8218.78	8147.35	8168.39	7864.38	7829.35	8302.66	8632.81	6792.59	6352.43	5402.1	4375.1	3468.16	2300.74	1586.94	1544.48	1429.5	1072.4	659.403	697.915	580.935	514.002	450.08	399.758	335.267	200.037	176.324	141.822	45.2071	129078
				2027	8409.6	8330.85	8304.3	8350.96	8269.17	8135.25	8038.6	8006.89	7680.71	7599.57	8014.44	8272.28	6480.1	5788.13	4612.1	3639.97	2822.13	1840.59	1247.57	1201.26	1105.57	819.668	505.542	531.022	439.851	387.926	337.56	306.481	189.499	153.874	123.427	40.5205	129985
				2028	8481.57	8384.37	8305.78	8279.24	8291.97	8185.14	8026.67	7879.67	7819.9	7455.3	7335.76	7679.73	7891.71	5904.46	4941.68	3837.15	2961.94	2257.71	1446.97	970.329	929.057	845.022	628.412	384.652	402.06	331.963	290.944	258.796	173.228	145.768	107.712	35.2648	130870
				2029	8501.59	8456.13	8359.14	8280.71	8220.76	8207.7	8075.89	7867.97	7695.65	7590.4	7196.49	7029.39	7326.43	7190.67	5040.99	4111.35	3122.39	2369.55	1774.88	1125.42	750.452	710.107	647.85	478.14	291.236	303.441	248.972	223.057	146.276	133.253	102.038	30.7749	131609
				2030	8539.76	8476.09	8430.68	8333.91	8222.22	8137.21	8098.15	7916.22	7684.22	7469.8	7326.9	6895.94	6706.01	6675.6	6139.11	4193.97	3345.51	2497.91	1862.81	1380.47	870.401	573.594	544.415	492.929	362.02	219.801	227.581	190.879	126.076	112.52	93.2768	29.1537	132175
				2031	8556.88	8514.14	8450.58	8405.24	8275.04	8138.66	8028.6	7938.04	7731.34	7458.71	7210.49	7020.91	6578.69	6110.29	5699.36	5107.58	3412.74	2676.41	1963.72	1448.85	1067.65	665.275	439.755	414.229	373.218	273.223	164.851	174.479	107.888	96.9814	78.764	26.6505	132609
				2032	8501.95	8531.21	8488.52	8425.08	8345.86	8190.95	8030.04	7869.87	7752.65	7504.44	7199.78	6909.35	6697.91	5994.29	5216.73	4741.72	4156.17	2730.19	2104.04	1527.34	1120.54	816.039	510.044	334.596	313.631	281.674	204.917	126.386	98.6184	82.9908	67.887	22.504	132898
				2033	8435.4	8476.44	8505.54	8462.9	8365.57	8261.05	8081.62	7871.27	7686.07	7525.13	7243.93	6899.09	6591.49	6102.92	5117.69	4340.18	3858.46	3324.93	2146.33	1636.48	1181.24	856.464	625.63	388.077	253.337	236.702	211.255	157.103	71.4353	75.8603	58.0935	19.3963	133067
				2034	8427.03	8410.09	8450.94	8479.87	8403.12	8280.55	8150.79	7921.84	7687.44	7460.5	7263.9	6941.4	6581.7	6005.95	5210.43	4257.78	3531.72	3086.77	2613.88	1669.37	1265.65	902.858	656.622	476.023	293.83	191.198	177.527	161.963	88.7974	54.9503	53.1022	16.5982	133174
				2035	8410.39	8401.75	8384.78	8425.43	8419.97	8317.72	8170.03	7989.64	7736.83	7461.83	7201.52	6960.53	6622.06	5997.03	5127.64	4334.94	3464.67	2825.37	2426.65	2033.02	1291.09	967.376	692.191	499.604	360.417	221.758	143.398	136.104	91.544	68.3057	38.4652	15.1721	133237
				2036	8401.6	8385.16	8376.47	8359.48	8365.92	8334.4	8206.71	8008.5	7803.04	7509.77	7202.8	6900.76	6640.32	6033.81	5120.03	4266.06	3527.45	2771.73	2221.15	1887.39	1572.33	986.817	741.655	526.667	378.271	272.013	166.319	109.939	76.9282	70.4185	47.814	10.9901	133283
				2037	8404.92	8376.39	8359.92	8351.19	8300.43	8280.9	8223.16	8044.45	7821.47	7574.04	7249.07	6901.99	6583.29	6050.44	5151.43	4259.73	3471.41	2821.96	2178.98	1727.56	1459.71	1201.78	756.56	564.303	398.762	285.488	204.01	127.511	62.1393	59.1756	49.2929	13.6611	133315
				2038	8442.8	8379.7	8351.19	8334.69	8292.2	8216.08	8170.37	8060.58	7856.58	7591.92	7311.11	6946.33	6584.46	5998.48	5165.63	4285.85	3466.25	2777.12	2218.47	1694.76	1336.1	1115.7	921.367	575.643	427.258	300.953	214.116	156.407	72.0715	47.7995	41.4229	14.0837	133368
				2039	8494.55	8417.47	8354.49	8325.98	8275.82	8207.93	8106.42	8008.84	7872.33	7626	7328.37	7005.78	6626.76	5999.55	5121.26	4297.67	3487.51	2773	2183.22	1725.48	1310.73	1021.22	855.37	701.04	435.844	322.459	225.715	164.156	88.4042	55.4396	33.4596	11.8351	133464
				2040	0	8469.07	8392.15	8329.27	8267.17	8191.72	8098.37	7946.14	7821.79	7641.29	7361.27	7022.32	6683.48	6038.09	5122.18	4260.76	3497.12	2790.01	2179.98	1698.06	1334.48	1001.83	782.935	650.825	530.788	328.939	241.844	173.048	92.7836	68.0032	38.8077	9.55989	125064
				2041	0	0	8443.58	8366.82	8270.44	8183.16	8082.38	7938.26	7760.57	7592.24	7376.03	7053.84	6699.26	6089.77	5155.08	4261.52	3467.09	2797.7	2193.35	1695.54	1313.28	1019.99	768.071	595.711	492.767	400.595	246.704	185.414	97.8097	71.372	47.6023	11.0879	116677
				2042	0	0	0	8418.1	8307.72	8186.39	8073.94	7922.58	7752.87	7532.81	7328.68	7067.98	6729.33	6104.14	5199.2	4288.89	3467.71	2773.67	2199.39	1705.94	1311.33	1003.78	781.99	584.402	451.038	371.9	300.446	189.14	104.799	75.2382	49.9604	13.6006	108297
				2043	0	0	0	0	8358.64	8223.29	8077.13	7914.31	7737.56	7525.34	7271.31	7022.61	6742.82	6131.55	5211.48	4325.6	3489.98	2774.16	2180.51	1710.64	1319.37	1002.29	769.565	594.992	442.476	340.406	278.925	230.342	106.905	80.6147	52.6667	14.2744	99929.7
				2044	0	0	0	0	0	8273.69	8113.53	7917.43	7729.47	7510.48	7264.1	6967.64	6699.54	6143.84	5234.87	4335.81	3519.85	2791.99	2180.89	1695.95	1323.01	1008.44	768.422	585.538	450.494	333.944	255.305	213.842	130.193	82.2348	56.4303	15.0476	91602
				2045	0	0	0	0	0	0	8163.26	7953.12	7732.52	7502.63	7249.75	6960.73	6647.09	6104.4	5245.37	4355.28	3528.16	2815.88	2194.9	1696.25	1311.65	1011.22	773.134	584.669	443.336	339.996	250.458	195.734	120.867	100.149	57.5643	16.1229	83354.2
				2046	0	0	0	0	0	0	0	8001.87	7767.38	7505.59	7242.18	6946.98	6640.5	6056.61	5211.7	4364.01	3544	2822.53	2213.69	1707.15	1311.88	1002.53	775.265	588.254	442.678	334.593	254.997	192.018	110.632	92.975	70.104	16.447	75216.6
				2047	0	0	0	0	0	0	0	0	7814.99	7539.42	7245.04	6939.72	6627.39	6050.61	5170.9	4335.99	3551.11	2835.2	2218.92	1721.76	1320.31	1002.71	768.607	589.876	445.392	334.097	250.945	195.497	108.532	85.1016	65.0825	20.0297	67237.2
				2048	0	0	0	0	0	0	0	0	0	7585.63	7277.7	6942.46	6620.46	6038.66	5165.77	4302.05	3528.31	2840.88	2228.88	1725.82	1331.61	1009.15	768.744	584.81	446.62	336.145	250.572	192.391	110.499	83.486	59.5711	18.595	59448.8
				2049	0	0	0	0	0	0	0	0	0	0	7322.3	6973.76	6623.07	6032.35	5155.57	4297.78	3500.69	2822.65	2233.35	1733.57	1334.75	1017.79	773.683	584.914	442.785	337.072	252.109	192.106	108.743	84.9989	58.4402	17.0203	51899.5
				2050	0	0	0	0	0	0	0	0	0	0	0	7016.5	6652.93	6034.73	5150.18	4289.3	3497.22	2800.55	2219.01	1737.05	1340.74	1020.19	780.304	588.672	442.864	334.177	252.804	193.284	108.581	83.6483	59.4992	16.6972	44618.9
				ICE car miles (billions)
				Year/age	0	1	2	3	4	5	6	7	8	9	10	11	12	13	14	15	16	17	18	19	20	21	22	23	24	25	26	27	28	29	30	31	Total
				2018	117.883	124.581	129.821	103.139	97.446	87.3999	79.4406	72.076	55.7702	45.3779	52.7487	58.542	52.7591	37.6903	43.3281	38.497	35.7687	32.4724	29.6019	24.6906	19.7858	17.0325	14.7682	12.3574	10.3699	0	0	0	0	0	0	0	1393.35
				2019	115.645	114.031	120.522	125.607	99.4043	93.6454	83.7439	75.6465	68.4088	52.6309	42.6081	49.1952	54.391	46.8507	31.3852	35.1894	30.6086	27.9881	24.9962	22.5706	18.7435	14.8639	12.8527	11.0763	9.23716	7.82631	0	0	0	0	0	0	1389.67
				2020	117.741	111.867	110.316	116.609	121.058	95.5274	89.7281	79.7443	71.7976	64.5581	49.4185	39.7378	45.707	48.2999	39.0133	25.4898	27.9788	23.9505	21.5443	19.0589	17.1342	14.0809	11.2163	9.63969	8.27955	6.97144	5.86973	0	0	0	0	0	1392.34
				2021	115.87	113.894	108.221	106.735	112.387	116.337	91.5314	85.4428	75.6869	67.7562	60.6176	46.0893	36.9202	40.5884	40.22	31.685	20.2667	21.8927	18.4363	16.4269	14.4683	12.8719	10.6254	8.41235	7.20566	6.24872	5.22858	4.50013	0	0	0	0	1396.57
				2022	115.698	112.084	110.182	104.708	102.87	108.004	111.47	87.1599	81.0955	71.4265	63.6205	56.534	42.8214	32.7856	33.7985	32.6651	25.1925	15.8582	16.8523	14.0572	12.4703	10.8692	9.71313	7.96919	6.28823	5.43824	4.68654	4.00858	2.54355	0	0	0	1402.87
				2023	116.408	111.918	108.432	106.606	100.917	98.8576	103.486	106.147	82.7252	76.5306	67.0668	59.3346	52.5255	38.0259	27.301	27.4498	25.9717	19.7125	12.2071	12.8494	10.6713	9.36817	8.20188	7.28495	5.95696	4.74583	4.07868	3.59301	2.26572	1.95658	0	0	1412.59
				2024	116.729	112.604	108.271	104.912	102.746	96.9808	94.7223	98.5433	100.746	78.0686	71.8594	62.5488	55.1275	46.6433	31.6647	22.1728	21.8251	20.3222	15.174	9.30761	9.75444	8.01671	7.06923	6.1515	5.44549	4.49582	3.55937	3.12699	2.03083	1.74286	1.3696	0	1423.73
				2025	115.726	112.914	108.935	104.756	101.113	98.7383	92.924	90.1984	93.5295	95.075	73.3035	67.0185	58.1138	48.9539	38.8405	25.7168	17.6294	17.0776	15.6434	11.5698	7.06574	7.32792	6.04942	5.302	4.59824	4.10981	3.37187	2.72885	1.76743	1.56218	1.22	0.391316	1433.27
				2026	115.747	111.945	109.235	105.399	100.963	97.1694	94.608	88.486	85.6092	88.2647	89.2718	68.3653	62.2665	51.6057	40.7646	31.5447	20.4472	13.7945	13.1458	11.9277	8.78303	5.30806	5.52966	4.53713	3.96324	3.47037	3.08236	2.5851	1.54239	1.35956	1.09353	0.348572	1442.16
				2027	116.49	111.965	108.297	105.689	101.582	97.0252	93.1047	90.0896	83.9839	80.7902	82.8772	83.2579	63.5179	55.2934	42.9728	33.1074	25.0809	15.9994	10.6186	10.0233	9.05471	6.59816	4.00547	4.1473	3.3915	2.99113	2.60278	2.36314	1.46114	1.18646	0.951691	0.312436	1450.83
				2028	117.487	112.684	108.316	104.781	101.862	97.6201	92.9665	88.6581	85.5058	79.2564	75.859	77.2941	77.3545	56.4046	46.0436	34.9008	26.3234	19.6252	12.3158	8.09639	7.60904	6.80225	4.97898	3.00415	3.10011	2.55962	2.24334	1.99546	1.33569	1.12396	0.83052	0.271912	1459.21
				2029	117.765	113.648	109.012	104.8	100.987	97.8892	93.5366	88.5265	84.1472	80.6927	74.4188	70.7487	71.8136	68.6917	46.9689	37.3948	27.7493	20.5974	15.1068	9.39049	6.14626	5.71622	5.13299	3.73429	2.2456	2.3397	1.91972	1.7199	1.12787	1.02745	0.786769	0.237292	1466.02
				2030	118.293	113.917	109.945	105.473	101.005	97.0486	93.7945	89.0693	84.0223	79.4106	75.7674	69.4055	65.7322	63.7713	57.2006	38.1463	29.7323	21.7131	15.8552	11.5185	7.12865	4.61731	4.31347	3.8498	2.79138	1.69479	1.75478	1.47178	0.972116	0.867592	0.719216	0.224791	1471.23
				2031	118.531	114.428	110.204	106.376	101.654	97.0659	92.9889	89.3149	84.5375	79.2927	74.5635	70.6633	64.4843	58.371	53.1033	46.4561	30.3298	23.2647	16.7141	12.0892	8.74414	5.35533	3.48423	3.23514	2.87772	2.1067	1.27109	1.34533	0.831877	0.747781	0.607315	0.20549	1475.24
				2032	117.77	114.657	110.699	106.627	102.524	97.6894	93.0055	88.5478	84.7706	79.7789	74.4529	69.5405	65.6529	57.2628	48.6064	43.1284	36.9368	23.7323	17.9084	12.744	9.17731	6.56894	4.04114	2.61321	2.41827	2.17186	1.58003	0.974504	0.760403	0.639906	0.523447	0.173518	1477.68
				2033	116.848	113.921	110.921	107.106	102.766	98.5255	93.603	88.5636	84.0425	79.9988	74.9094	69.4372	64.6097	58.3006	47.6836	39.4762	34.291	28.9021	18.2683	13.6547	9.67444	6.89436	4.95694	3.0309	1.95337	1.82511	1.6289	1.21135	0.550807	0.584926	0.447934	0.149556	1478.74
				2034	116.732	113.03	110.209	107.321	103.228	98.7581	94.4041	89.1326	84.0575	79.3118	75.1159	69.863	64.5138	57.3742	48.5477	38.7267	31.3871	26.8318	22.2479	13.9291	10.3658	7.26783	5.20249	3.71775	2.26559	1.47424	1.36883	1.24882	0.684678	0.423697	0.409448	0.127981	1479.28
				2035	116.501	112.918	109.346	106.632	103.434	99.2014	94.627	89.8954	84.5975	79.3259	74.4708	70.0556	64.9094	57.289	47.7763	39.4285	30.7913	24.5596	20.6543	16.9634	10.5741	7.78718	5.48431	3.90193	2.77902	1.70988	1.10568	1.04944	0.705856	0.526675	0.296588	0.116985	1479.41
				2036	116.38	112.695	109.238	105.797	102.77	99.4003	95.0518	90.1076	85.3216	79.8355	74.4841	69.454	65.0883	57.6403	47.7054	38.802	31.3493	24.0934	18.9052	15.7483	12.8775	7.94368	5.87622	4.11329	2.91669	2.09737	1.28241	0.84769	0.59316	0.542966	0.368673	0.0847395	1479.41
				2037	116.426	112.577	109.022	105.692	101.966	98.7622	95.2423	90.5121	85.523	80.5188	74.9626	69.4664	64.5293	57.7992	47.9979	38.7444	30.8511	24.53	18.5463	14.4147	11.9551	9.67411	5.99431	4.40722	3.07468	2.20127	1.57303	0.983182	0.479129	0.456277	0.380076	0.105335	1479.37
				2038	116.95	112.621	108.908	105.483	101.865	97.9891	94.6309	90.6936	85.9069	80.7089	75.6041	69.9126	64.5409	57.3028	48.1302	38.982	30.8053	24.1402	18.8824	14.1411	10.9427	8.98115	7.3001	4.4958	3.2944	2.32052	1.65095	1.20599	0.555711	0.368561	0.319394	0.108593	1479.74
				2039	117.667	113.129	108.951	105.373	101.664	97.8919	93.8902	90.1114	86.0792	81.0712	75.7826	70.511	64.9555	57.3131	47.7169	39.0895	30.9942	24.1044	18.5824	14.3973	10.735	8.22061	6.77719	5.47515	3.3606	2.48634	1.74039	1.26573	0.681646	0.42747	0.257993	0.0912554	1480.79
				2040	0	113.822	109.442	105.415	101.557	97.6986	93.797	89.406	85.5266	81.2338	76.1228	70.6774	65.5114	57.6812	47.7254	38.7538	31.0797	24.2522	18.5548	14.1686	10.9295	8.06454	6.20328	5.08297	4.09267	2.5363	1.86475	1.3343	0.715413	0.524343	0.299229	0.0737122	1364.15
				2041	0	0	110.113	105.89	101.598	97.5965	93.6118	89.3173	84.8571	80.7123	76.2755	70.9947	65.6661	58.1749	48.032	38.7607	30.8128	24.3191	18.6686	14.1475	10.7559	8.21068	6.08551	4.65253	3.79951	3.08881	1.90223	1.42964	0.754168	0.550318	0.36704	0.0854941	1251.23
				2042	0	0	0	106.539	102.056	97.6351	93.514	89.1409	84.7729	80.0805	75.7858	71.1371	65.9608	58.3123	48.4431	39.0097	30.8183	24.1102	18.72	14.2343	10.7399	8.08022	6.1958	4.5642	3.47776	2.86756	2.31661	1.45838	0.80806	0.580129	0.385223	0.104869	1141.85
				2043	0	0	0	0	102.681	98.0752	93.5509	89.0478	84.6055	80.001	75.1926	70.6804	66.0931	58.574	48.5574	39.3435	31.0162	24.1145	18.5593	14.2735	10.8057	8.06823	6.09735	4.64691	3.41174	2.62472	2.15067	1.77607	0.824299	0.621584	0.40609	0.110064	1035.91
				2044	0	0	0	0	0	98.6763	93.9726	89.083	84.5171	79.843	75.118	70.1271	65.6688	58.6915	48.7754	39.4364	31.2817	24.2694	18.5626	14.1509	10.8355	8.1177	6.0883	4.57308	3.47356	2.57489	1.96854	1.64885	1.00386	0.634076	0.435109	0.116026	933.643
				2045	0	0	0	0	0	0	94.5486	89.4845	84.5505	79.7596	74.9696	70.0575	65.1547	58.3147	48.8732	39.6135	31.3555	24.4771	18.6818	14.1535	10.7425	8.14008	6.12563	4.56629	3.41837	2.62156	1.93117	1.50922	0.931956	0.772202	0.443853	0.124317	835.322
				2046	0	0	0	0	0	0	0	90.033	84.9316	79.7911	74.8913	69.9192	65.0901	57.8582	48.5595	39.6929	31.4963	24.5349	18.8417	14.2444	10.7444	8.07017	6.14252	4.59429	3.4133	2.5799	1.96617	1.48056	0.853036	0.716889	0.540542	0.126815	741.113
				2047	0	0	0	0	0	0	0	0	85.4521	80.1508	74.9209	69.8461	64.9616	57.8008	48.1793	39.4381	31.5595	24.6451	18.8862	14.3663	10.8134	8.07161	6.08976	4.60695	3.43423	2.57607	1.93493	1.5074	0.836841	0.656181	0.501822	0.15444	651.39
				2048	0	0	0	0	0	0	0	0	0	80.642	75.2586	69.8737	64.8937	57.6867	48.1315	39.1294	31.3569	24.6945	18.971	14.4002	10.906	8.12346	6.09085	4.56739	3.44369	2.59187	1.93205	1.48344	0.852006	0.643724	0.459327	0.143378	566.275
				2049	0	0	0	0	0	0	0	0	0	0	75.7199	70.1887	64.9193	57.6264	48.0365	39.0905	31.1114	24.536	19.009	14.4648	10.9317	8.19299	6.12998	4.5682	3.41412	2.59901	1.9439	1.48124	0.838468	0.655389	0.450607	0.131236	486.039
				2050	0	0	0	0	0	0	0	0	0	0	0	70.6189	65.212	57.6492	47.9863	39.0133	31.0805	24.3439	18.887	14.4938	10.9808	8.21233	6.18244	4.59755	3.41473	2.57669	1.94926	1.49032	0.837224	0.644976	0.458772	0.128745	410.759

## Sheet: ICE light truck stock and miles
				truck survival curve	1	0.991	0.990918	0.990835	0.986639	0.980208	0.976621	0.969532	0.964085	0.958091	0.952612	0.945153	0.940621	0.934003	0.929339	0.91405	0.907776	0.90239	0.898455	0.894349	0.89011	0.888889	0.885417	0.882353	0.88	0.878788	0.87931	0.869281	0.879699	0.871795	0.872549	0.303371
				2018 LT ICE age dist (VISION18)		0.0749847	0.0756606	0.0981051	0.0745108	0.0630408	0.0529388	0.0397384	0.0407929	0.035849	0.0442322	0.0526336	0.0504185	0.0488394	0.0443984	0.0388102	0.0339224	0.0294444	0.0249616	0.0186313	0.0170711	0.0129586	0.0105763	0.00903247	0.00844843	0	0	0	0	0	0	0
				2018 LT ICE annual miles dist (VISION18)	15300.3	14798.1	14311.4	13840.1	13384.3	12944	12519.2	12109.8	11715.9	11337.5	10974.6	10627.2	10295.2	9978.73	9677.71	9392.18	9122.12	8867.53	8628.43	8404.8	8196.65	8003.97	7826.78	7665.06	7518.81	7518.81	7518.81	7518.81	7518.81	7518.81	7518.81	7518.81
				ICE truck stock (thousands)
				Year/age	0	1	2	3	4	5	6	7	8	9	10	11	12	13	14	15	16	17	18	19	20	21	22	23	24	25	26	27	28	29	30	31	Total
				2018	7482.26	8206.01	8279.99	10736.2	8154.15	6898.93	5793.4	4348.81	4464.21	3923.17	4840.59	5760	5517.59	5344.78	4858.78	4247.23	3712.33	3222.28	2731.7	2038.94	1868.19	1418.13	1157.42	988.476	924.562	0	0	0	0	0	0	0	116918
				2019	7501.02	7414.92	8131.49	8204.1	10592.8	7992.77	6737.64	5616.89	4192.62	4277.12	3737.26	4575.1	5417.98	5153.45	4967.12	4441.16	3855.53	3349.97	2895.07	2443.09	1814.88	1660.61	1255.64	1021.25	869.859	812.494	0	0	0	0	0	0	118932
				2020	7141.98	7433.51	7347.58	8056.97	8094.49	10383.1	7805.9	6532.36	5415.16	4016.91	4074.44	3532.28	4303.43	5060.41	4789.3	4540.19	4031.58	3479.2	3009.8	2589.2	2174.62	1613.22	1470.33	1107.92	898.704	764.422	714.434	0	0	0	0	0	120381
				2021	6788.44	7077.71	7366	7280.24	7949.32	7934.29	10140.4	7568.07	6297.75	5188.22	3826.56	3850.97	3322.53	4019.42	4702.84	4377.66	4121.48	3638.06	3125.9	2691.81	2304.68	1933	1428.38	1297.35	974.967	789.77	672.164	621.044	0	0	0	0	121289
				2022	6714.55	6727.34	7013.43	7298.5	7182.97	7791.99	7748.79	9831.42	7296.27	6033.81	4942.36	3616.69	3622.3	3103.26	3735.41	4298.63	3973.93	3719.18	3268.63	2795.64	2396.01	2048.6	1711.51	1260.33	1141.67	856.789	694.453	584.299	546.332	0	0	0	121955
				2023	6696.9	6654.12	6666.24	6949.15	7200.98	7040.81	7609.82	7512.7	9478.33	6990.49	5747.89	4671.29	3401.93	3383.24	2883.98	3414.35	3902.19	3586.04	3341.52	2923.3	2488.43	2129.78	1813.87	1510.15	1109.09	1003.29	753.383	603.675	514.008	476.289	0	0	122457
				2024	6637.61	6636.62	6593.69	6605.15	6856.31	7058.46	6876.2	7377.96	7242.88	9081.1	6659.23	5432.63	4393.91	3177.41	3144.18	2636.1	3099.46	3521.3	3221.89	2988.48	2602.06	2211.94	1885.75	1600.47	1328.94	974.656	882.2	654.902	531.052	448.109	415.586	0	122776
				2025	6637.62	6577.88	6576.35	6533.26	6516.9	6720.61	6893.44	6666.69	7112.98	6939.34	8650.77	6293.99	5110.05	4103.92	2952.9	2873.93	2392.99	2796.92	3163.73	2881.5	2660.08	2312.94	1958.49	1663.89	1408.41	1167.85	857.025	766.879	576.117	462.969	390.997	126.077	122747
				2026	6725.19	6577.88	6518.14	6516.08	6445.97	6387.92	6563.48	6683.41	6427.26	6814.88	6610.5	8176.3	5920.25	4772.8	3813.94	2699.09	2608.89	2159.41	2512.91	2829.48	2564.85	2364.51	2047.91	1728.08	1464.23	1237.7	1026.9	744.996	674.623	502.256	403.963	118.617	122642
				2027	6693.22	6664.66	6518.15	6458.4	6429.02	6318.39	6238.57	6363.51	6443.38	6157.9	6491.94	6247.93	7690.8	5529.54	4435.55	3486.13	2450.17	2354.23	1940.13	2247.42	2518.54	2279.87	2093.58	1806.98	1520.71	1286.74	1088.32	892.669	655.372	588.133	438.243	122.551	122451
				2028	6686.87	6632.98	6604.14	6458.41	6372.11	6301.78	6170.67	6048.5	6134.96	6173.34	5866.09	6135.88	5876.94	7183.23	5138.82	4054.31	3164.62	2211.01	2115.17	1735.15	2000.45	2238.71	2018.63	1847.28	1590.14	1336.38	1131.45	946.055	785.28	571.35	513.175	132.95	122177
				2029	6641.89	6626.69	6572.75	6543.61	6372.12	6246	6154.45	5982.67	5831.27	5877.85	5880.8	5544.35	5771.54	5489.08	6675.66	4697.13	3680.41	2855.73	1986.49	1891.7	1544.48	1778.18	1982.19	1781.14	1625.6	1397.4	1175.09	983.546	832.244	684.603	498.531	155.682	121761
				2030	6647.67	6582.12	6566.51	6512.51	6456.18	6246	6099.97	5966.94	5767.8	5586.88	5599.32	5558.26	5215.14	5390.63	5101.21	6101.88	4263.94	3321.16	2565.74	1776.62	1683.82	1372.87	1574.43	1748.99	1567.41	1428.56	1228.75	1021.49	865.224	725.546	597.35	151.24	121292
				2031	6620.46	6587.84	6522.34	6506.33	6425.49	6328.41	6099.98	5914.11	5752.63	5526.08	5322.13	5292.21	5228.21	4870.95	5009.73	4662.76	5539.14	3847.74	2983.92	2294.67	1581.39	1496.73	1215.56	1389.2	1539.11	1377.42	1256.15	1068.13	898.6	754.298	633.075	181.218	120726
				2032	6567.9	6560.87	6528.01	6462.56	6419.4	6298.32	6180.45	5914.12	5701.71	5511.55	5264.21	5030.23	4977.96	4883.17	4526.77	4579.14	4232.74	4998.47	3457.02	2668.66	2042.51	1405.68	1325.23	1072.55	1222.5	1352.55	1211.18	1091.94	939.631	783.395	658.162	192.056	120061
				2033	6521.72	6508.79	6501.29	6468.18	6376.22	6292.35	6151.07	5992.15	5701.72	5462.76	5250.37	4975.48	4731.54	4649.43	4538.12	4137.69	4156.83	3819.59	4490.9	3091.78	2375.4	1815.56	1244.61	1169.32	943.848	1074.32	1189.31	1052.85	960.583	819.166	683.551	199.667	119346
				2034	6511.29	6463.02	6449.67	6441.7	6381.76	6250.02	6145.24	5963.66	5776.94	5462.76	5203.89	4962.4	4680.04	4419.27	4320.9	4148.07	3756.09	3751.08	3431.73	4016.43	2752.03	2111.47	1607.53	1098.18	1029	829.442	944.656	1033.85	926.195	837.431	714.762	207.369	118628
				2035	6509.11	6452.69	6404.33	6390.56	6355.64	6255.46	6103.9	5958	5749.48	5534.83	5203.9	4918.47	4667.74	4371.17	4107	3949.52	3765.51	3389.46	3370.18	3069.16	3575.06	2446.25	1869.53	1418.41	966.402	904.275	729.337	821.172	909.474	807.452	730.7	216.838	117921
				2036	6519.91	6450.53	6394.08	6345.63	6305.18	6229.85	6109.21	5917.93	5744.02	5508.52	5272.55	4918.48	4626.42	4359.68	4062.3	3754.01	3585.28	3397.96	3045.28	3014.12	2731.89	3177.83	2165.95	1649.58	1248.2	849.263	795.139	633.999	722.384	792.875	704.542	221.673	117254
				2037	6495.68	6461.23	6391.95	6335.48	6260.85	6180.39	6084.2	5923.07	5705.39	5503.3	5247.49	4983.37	4626.42	4321.09	4051.62	3713.15	3407.8	3235.32	3052.92	2723.54	2682.89	2428.35	2813.71	1911.13	1451.63	1096.9	746.765	691.199	557.728	629.771	691.822	213.737	116620
				2038	6531.79	6437.22	6402.55	6333.37	6250.84	6136.94	6035.9	5898.83	5710.35	5466.28	5242.51	4959.68	4687.46	4321.09	4015.76	3703.38	3370.71	3075.16	2906.79	2730.37	2424.25	2384.8	2150.1	2482.68	1681.79	1275.68	964.516	649.149	608.047	486.225	549.506	209.879	116084
				2039	6574.52	6473.01	6378.76	6343.87	6248.75	6127.12	5993.46	5852	5686.97	5471.03	5207.24	4954.97	4665.18	4378.1	4015.76	3670.6	3361.84	3041.69	2762.89	2599.68	2430.33	2154.89	2111.54	1897.15	2184.76	1477.94	1121.72	838.436	571.056	530.093	424.255	166.704	115716
				2040	0	6515.35	6414.22	6320.3	6259.12	6125.07	5983.87	5810.85	5641.82	5448.64	5211.77	4921.64	4660.75	4357.29	4068.74	3670.61	3332.08	3033.69	2732.82	2470.99	2314	2160.29	1907.98	1863.12	1669.49	1919.94	1299.57	975.088	737.571	497.844	462.532	128.707	108916
				2041	0	0	6456.18	6355.44	6235.85	6135.24	5981.87	5801.56	5602.16	5405.38	5190.44	4925.92	4629.4	4353.15	4049.4	3719.03	3332.09	3006.84	2725.64	2444.1	2199.45	2056.89	1912.76	1683.51	1639.55	1467.13	1688.22	1129.69	857.784	643.011	434.393	140.319	102202
				2042	0	0	0	6397.01	6270.52	6112.43	5991.8	5799.62	5593.2	5367.37	5149.23	4905.76	4633.42	4323.87	4045.56	3701.35	3376.05	3006.84	2701.51	2437.67	2175.51	1955.07	1821.21	1687.73	1481.49	1440.81	1290.06	1467.54	993.787	747.812	561.059	131.782	95567.1
				2043	0	0	0	0	6311.54	6146.42	5969.53	5809.24	5591.33	5358.79	5113.03	4866.81	4614.46	4327.63	4018.34	3697.84	3360	3046.51	2701.51	2416.09	2169.79	1933.79	1731.05	1606.95	1485.2	1301.91	1266.92	1121.42	1291	866.379	652.502	170.209	88946.2
				2044	0	0	0	0	0	6186.62	6002.72	5787.65	5600.6	5357	5104.85	4832.59	4577.82	4309.92	4021.84	3672.97	3356.81	3032.03	2737.15	2416.09	2150.59	1928.71	1712.21	1527.4	1414.11	1305.18	1144.79	1101.31	986.516	1125.48	755.958	197.95	82346.9
				2045	0	0	0	0	0	0	6041.98	5819.83	5579.79	5365.89	5103.14	4824.86	4545.64	4275.7	4005.38	3676.16	3334.23	3029.15	2724.14	2447.97	2150.59	1911.63	1707.71	1510.77	1344.11	1242.71	1147.66	995.141	968.823	860.04	982.039	229.336	75824.4
				2046	0	0	0	0	0	0	0	5857.9	5610.81	5345.94	5111.61	4823.25	4538.37	4245.64	3973.58	3661.11	3337.13	3008.78	2721.56	2436.33	2178.96	1911.64	1692.59	1506.8	1329.48	1181.19	1092.72	997.636	875.424	844.615	750.427	297.922	69331.4
				2047	0	0	0	0	0	0	0	0	5647.51	5375.67	5092.61	4831.25	4536.85	4238.85	3945.64	3632.05	3323.47	3011.39	2703.25	2434.02	2168.6	1936.86	1692.59	1493.46	1325.99	1168.33	1038.63	949.884	877.62	763.191	736.968	227.658	63152.3
				2048	0	0	0	0	0	0	0	0	0	5410.83	5120.93	4813.3	4544.38	4237.43	3939.33	3606.51	3297.08	2999.07	2705.6	2417.65	2166.55	1927.65	1714.92	1493.47	1314.25	1165.26	1027.33	902.862	835.612	765.104	665.921	223.575	57294.6
				2049	0	0	0	0	0	0	0	0	0	0	5154.42	4840.06	4527.49	4244.46	3938.01	3600.74	3273.9	2975.26	2694.53	2419.75	2151.97	1925.82	1706.77	1513.17	1314.25	1154.94	1024.63	893.035	794.247	728.482	667.591	202.021	51745.6
				2050	0	0	0	0	0	0	0	0	0	0	0	4871.72	4552.66	4228.69	3944.55	3599.54	3268.67	2954.34	2673.13	2409.85	2153.84	1912.86	1705.15	1505.98	1331.59	1154.95	1015.55	890.687	785.603	692.421	635.637	202.528	46489.9
				ICE truck miles (billions)
				Year/age	0	1	2	3	4	5	6	7	8	9	10	11	12	13	14	15	16	17	18	19	20	21	22	23	24	25	26	27	28	29	30	31	Total
				2018	114.481	121.433	118.498	148.59	109.138	89.2998	72.5286	52.6633	52.3025	44.4791	53.1237	61.2126	56.8048	53.3341	47.0218	39.8907	33.8643	28.5737	23.5703	17.1368	15.3129	11.3507	9.05888	7.57673	6.95161	0	0	0	0	0	0	0	1388.2
				2019	114.768	109.727	116.373	113.546	141.777	103.458	84.3497	68.0195	49.1206	48.4921	41.015	48.6204	55.7793	51.4248	48.0703	41.7122	35.1706	29.706	24.9799	20.5337	14.8759	13.2915	9.82761	7.82797	6.54031	6.10899	0	0	0	0	0	0	1405.11
				2020	109.275	110.002	105.154	111.509	108.339	134.399	97.7235	79.1057	63.4437	45.542	44.7154	37.5382	44.3048	50.4964	46.3495	42.6423	36.7765	30.8519	25.9698	21.7617	17.8246	12.9122	11.508	8.49224	6.75719	5.74754	5.3717	0	0	0	0	0	1414.51
				2021	103.865	104.737	105.418	100.759	106.396	102.701	126.949	91.648	73.7841	58.8217	41.9951	40.9249	34.2062	40.1087	45.5127	41.1157	37.5966	32.2606	26.9716	22.6241	18.8906	15.4717	11.1796	9.94428	7.33059	5.93813	5.05387	4.66951	0	0	0	0	1416.87
				2022	102.735	99.5518	100.372	101.012	96.1391	100.86	97.0084	119.057	85.4827	68.4087	54.2406	38.4352	37.2924	30.9666	36.1502	40.3735	36.2507	32.98	28.2031	23.4968	19.6392	16.3969	13.3956	9.66051	8.584	6.44204	5.22146	4.39324	4.10777	0	0	0	1416.86
				2023	102.465	98.4683	95.403	96.1769	96.3802	91.1362	95.2686	90.9775	111.048	79.255	63.0809	49.6426	35.0236	33.7604	27.9103	32.0681	35.5962	31.7993	28.832	24.5697	20.3968	17.0467	14.1967	11.5754	8.33905	7.54352	5.66455	4.53892	3.86473	3.58113	0	0	1415.61
				2024	101.558	98.2094	94.3646	91.4159	91.7669	91.3648	86.0843	89.3458	84.8572	102.957	73.0825	57.7336	45.2362	31.7065	30.4284	24.7587	28.2736	31.2252	27.7999	25.1176	21.3281	17.7043	14.7593	12.2677	9.99202	7.32826	6.63309	4.92409	3.99288	3.36925	3.12471	0	1412.71
				2025	101.558	97.34	94.1165	90.4209	87.2242	86.9916	86.3002	80.7325	83.3354	78.6751	94.939	66.8874	52.609	40.9519	28.5773	26.9925	21.8291	24.8018	27.298	24.2184	21.8037	18.5127	15.3286	12.7538	10.5896	8.78086	6.44381	5.76602	4.33171	3.48097	2.93984	0.947946	1407.48
				2026	102.898	97.3401	93.2834	90.1832	86.2749	82.6853	82.1694	80.9349	75.3015	77.2641	72.5478	86.8911	60.9503	47.6264	36.9102	25.3504	23.7986	19.1486	21.6825	23.7812	21.0232	18.9255	16.0286	13.2458	11.0092	9.30601	7.7211	5.60148	5.07237	3.77637	3.03732	0.89186	1402.66
				2027	102.408	98.6243	93.2835	89.3849	86.048	81.7853	78.1018	77.061	75.4903	69.8155	71.2467	66.3979	79.1785	55.1777	42.926	32.7423	22.3508	20.8763	16.7403	18.8891	20.6436	18.248	16.386	13.8506	11.4339	9.67479	8.18287	6.71181	4.92762	4.42206	3.29506	0.921434	1397.23
				2028	102.311	98.1555	94.5142	89.385	85.2863	81.5703	77.2517	73.2462	71.8769	69.9906	64.3782	65.2071	60.5043	71.6795	49.732	38.0788	28.8681	19.6062	18.2506	14.5836	16.397	17.9185	15.7994	14.1595	11.956	10.048	8.50714	7.11321	5.90437	4.29587	3.85847	0.999626	1391.43
				2029	101.623	98.0624	94.0649	90.5642	85.2864	80.8482	77.0486	72.449	68.3188	66.6405	64.5396	58.9209	59.4192	54.774	64.6051	44.1163	33.5731	25.3232	17.1403	15.8994	12.6595	14.2325	15.5141	13.6526	12.2226	10.5068	8.8353	7.3951	6.25749	5.1474	3.74836	1.17055	1384.56
				2030	101.711	97.4028	93.9757	90.1337	86.4116	80.8483	76.3666	72.2585	67.5752	63.3416	61.4504	59.0686	53.6909	53.7916	49.3681	57.31	38.8962	29.4505	22.1383	14.9321	13.8017	10.9884	12.3227	13.4061	11.785	10.7411	9.23873	7.68036	6.50546	5.45525	4.49136	1.13714	1377.68
				2031	101.295	97.4875	93.3435	90.0482	86.0008	81.9149	76.3667	71.6189	67.3976	62.6522	58.4084	56.2413	53.8256	48.6059	48.4827	43.7935	50.5287	34.12	25.7465	19.2862	12.9621	11.9798	9.51393	10.6483	11.5723	10.3566	9.44473	8.03105	6.75641	5.67143	4.75997	1.36255	1370.22
				2032	100.491	97.0884	93.4247	89.4425	85.9192	81.5255	77.3742	71.619	66.8009	62.4874	57.7727	53.4572	51.2492	48.7278	43.8088	43.0081	38.6116	44.3241	29.8287	22.4296	16.7417	11.251	10.3723	8.22119	9.19172	10.1696	9.10662	8.21013	7.06491	5.8902	4.9486	1.44404	1362
				2033	99.7843	96.3176	93.0423	89.5203	85.3413	81.4482	77.0064	72.5638	66.801	61.9343	57.6208	52.8754	48.7122	46.3954	43.9186	38.8619	37.9191	33.8703	38.7494	25.9858	19.4703	14.5317	9.74128	8.96292	7.09661	8.07757	8.94222	7.91622	7.22244	6.15915	5.13949	1.50126	1353.43
				2034	99.6247	95.6404	92.3036	89.1538	85.4155	80.9003	76.9333	72.2189	67.6823	61.9344	57.1108	52.7363	48.1821	44.0987	41.8164	38.9594	34.2635	33.2629	29.6104	33.7573	22.5574	16.9001	12.5818	8.41765	7.73688	6.23642	7.10269	7.7733	6.96389	6.29649	5.37416	1.55917	1345.1
				2035	99.5914	95.4874	91.6546	88.446	85.0658	80.9707	76.4158	72.1504	67.3606	62.7514	57.1108	52.2695	48.0554	43.6187	39.7464	37.0946	34.3495	30.0562	29.0794	25.7957	29.3035	19.5797	14.6324	10.8722	7.2662	6.79908	5.48375	6.17424	6.83817	6.07108	5.494	1.63036	1337.21
				2036	99.7567	95.4555	91.508	87.8242	84.3905	80.6392	76.4822	71.665	67.2967	62.4532	57.8643	52.2696	47.63	43.5041	39.3138	35.2583	32.7053	30.1316	26.276	25.333	22.3923	25.4353	16.9524	12.6442	9.38497	6.38545	5.9785	4.76692	5.43147	5.96148	5.29732	1.66672	1330.05
				2037	99.3859	95.6139	91.4774	87.6837	83.7972	79.999	76.1692	71.7274	66.844	62.3939	57.5892	52.9592	47.63	43.1189	39.2104	34.8745	31.0863	28.6893	26.3419	22.8908	21.9907	19.4364	22.0223	14.6489	10.9146	8.24739	5.61479	5.197	4.19345	4.73513	5.20168	1.60705	1323.29
				2038	99.9385	95.2585	91.6292	87.6544	83.6631	79.4365	75.5645	71.4338	66.9021	61.9742	57.5346	52.7074	48.2584	43.119	38.8633	34.7828	30.748	27.2691	25.081	22.9482	19.8707	19.0878	16.8283	19.0299	12.6451	9.59159	7.25202	4.88083	4.57179	3.65583	4.13163	1.57804	1317.89
				2039	100.592	95.7882	91.2887	87.7998	83.6352	79.3095	75.0332	70.8666	66.6283	62.0281	57.1476	52.6574	48.029	43.6879	38.8634	34.4749	30.6671	26.9723	23.8394	21.8498	19.9206	17.2477	16.5265	14.5417	16.4268	11.1124	8.43398	6.30404	4.29366	3.98567	3.18989	1.25342	1314.39
				2040	0	96.4147	91.7962	87.4735	83.774	79.283	74.9132	70.3684	66.0993	61.7742	57.1973	52.3032	47.9834	43.4802	39.3761	34.475	30.3956	26.9014	23.58	20.7682	18.9671	17.2909	14.9333	14.2809	12.5526	14.4357	9.77121	7.3315	5.54566	3.74319	3.47769	0.96772	1211.65
				2041	0	0	92.3967	87.9598	83.4626	79.4146	74.8881	70.2558	65.6346	61.2838	56.9631	52.3487	47.6607	43.4389	39.1889	34.9298	30.3957	26.6632	23.518	20.5421	18.0281	16.4633	14.9708	12.9042	12.3274	11.031	12.6934	8.49393	6.44952	4.83468	3.26612	1.05503	1113.46
				2042	0	0	0	88.5352	83.9266	79.1194	75.0124	70.2324	65.5296	60.8529	56.5109	52.1344	47.7021	43.1467	39.1517	34.7638	30.7967	26.6633	23.3098	20.4881	17.8319	15.6483	14.2542	12.9365	11.139	10.8332	9.69971	11.0342	7.4721	5.62266	4.21849	0.990845	1019.56
				2043	0	0	0	0	84.4756	79.5593	74.7336	70.3489	65.5077	60.7555	56.1136	51.7205	47.5068	43.1843	38.8884	34.7308	30.6503	27.015	23.3098	20.3068	17.785	15.478	13.5486	12.3173	11.167	9.78884	9.52575	8.43178	9.70675	6.51414	4.90604	1.27977	929.256
				2044	0	0	0	0	0	80.0797	75.1491	70.0874	65.6164	60.7352	56.0238	51.3569	47.1297	43.0075	38.9222	34.4971	30.6212	26.8866	23.6173	20.3068	17.6276	15.4373	13.4011	11.7076	10.6325	9.81339	8.60743	8.28056	7.41743	8.4623	5.68391	1.48835	842.596
				2045	0	0	0	0	0	0	75.6406	70.4771	65.3725	60.836	56.0051	51.2747	46.7983	42.666	38.7629	34.5271	30.4152	26.8611	23.5051	20.5747	17.6276	15.3007	13.3659	11.5802	10.1061	9.34367	8.62901	7.48228	7.2844	6.46648	7.38377	1.72433	760.011
				2046	0	0	0	0	0	0	0	70.9381	65.736	60.6099	56.098	51.2576	46.7235	42.3661	38.4551	34.3858	30.4417	26.6804	23.4828	20.4769	17.8602	15.3007	13.2475	11.5497	9.99612	8.88113	8.21598	7.50104	6.58215	6.3505	5.64232	2.24002	681.019
				2047	0	0	0	0	0	0	0	0	66.166	60.9469	55.8895	51.3426	46.7079	42.2983	38.1848	34.1128	30.3171	26.7036	23.3248	20.4575	17.7753	15.5025	13.2476	11.4475	9.96984	8.78447	7.80927	7.142	6.59866	5.73829	5.54112	1.71171	607.72
				2048	0	0	0	0	0	0	0	0	0	61.3455	56.2003	51.1518	46.7854	42.2842	38.1237	33.873	30.0764	26.5943	23.3451	20.3199	17.7584	15.4288	13.4223	11.4475	9.88158	8.76137	7.72427	6.78845	6.28281	5.75268	5.00694	1.68102	540.036
				2049	0	0	0	0	0	0	0	0	0	0	56.5679	51.4362	46.6115	42.3543	38.111	33.8188	29.8649	26.3832	23.2495	20.3375	17.639	15.4142	13.3585	11.5985	9.88159	8.68381	7.70397	6.71457	5.97179	5.47732	5.01949	1.51896	477.717
				2050	0	0	0	0	0	0	0	0	0	0	0	51.7726	46.8706	42.1969	38.1742	33.8075	29.8172	26.1977	23.0649	20.2543	17.6543	15.3105	13.3458	11.5434	10.012	8.68382	7.63577	6.69691	5.9068	5.20618	4.77923	1.52277	420.453

## Sheet: VISION miles dist by age
						typical annual miles
					Vehicle age	Passenger car	Light truck
					0	13852.1	15300.3
					1	13439.8	14798.1
					2	13041	14311.4
					3	12655.9	13840.1
					4	12284.4	13384.3
					5	11926.5	12944
					6	11582.2	12519.2
					7	11251.5	12109.8
					8	10934.4	11715.9
					9	10630.9	11337.5
					10	10341	10974.6
					11	10064.7	10627.2
					12	9801.99	10295.2
					13	9552.9	9978.73
					14	9317.4	9677.71
					15	9095.51	9392.18
					16	8887.22	9122.12
					17	8692.53	8867.53
					18	8511.44	8628.43
					19	8343.96	8404.8
					20	8190.08	8196.65
					21	8049.8	8003.97
					22	7923.12	7826.78
					23	7810.04	7665.06
					24	7710.56	7518.81
						7710.56	7518.81
						7710.56	7518.81
						7710.56	7518.81
						7710.56	7518.81
						7710.56	7518.81
						7710.56	7518.81
						7710.56	7518.81

## Sheet: EV 2018 stock dist by age
2018 Auto EV A age dist (VISION18) for cars													This table excludes the new modell vehicles of age zero
2018 LT EV A age dist (VISION18) for light trucks					2018 stock (VISION 2018)							2018 stock (VISION 2018)
					Age	Passenger Cars		Light Trucks					Passenger Cars		Light Trucks
						Surviving Vehicles by Age (000)	Distribution by age	Surviving Vehicles by Age (000)	Distribution by Age			Age	Surviving Vehicles by Age (000)	Distribution by age	Surviving Vehicles by Age (000)	Distribution by Age
					0	28.7922	0.134121	8.25449	0.369278			1	30.3821	0.163449	5.65828	0.401338
					1	30.3821	0.141527	5.65828	0.253132			2	32.5924	0.17534	5.65626	0.401195
					2	32.5924	0.151824	5.65626	0.253042			3	26.584	0.143016	0.198089	0.0140503
					3	26.584	0.123835	0.198089	0.00886183			4	46.2221	0.248665	1.17572	0.0833933
					4	46.2221	0.215314	1.17572	0.052598			5	27.294	0.146836	0	0
					5	27.294	0.127142	0	0			6	11.6613	0.0627354	0	0
					6	11.6613	0.0543212	0	0			7	9.29758	0.050019	0	0
					7	9.29758	0.0433104	0	0			8	0.142249	0.000765268	0.354018	0.0251103
					8	0.142249	0.000662629	0.354018	0.0158376			9	0.0969135	0.000521375	0.278834	0.0197775
					9	0.0969135	0.000451447	0.278834	0.0124741			10	0.0706317	0.000379984	0.0709134	0.00502983
					10	0.0706317	0.00032902	0.0709134	0.00317243			11	0.0207285	0.000111515	0.0612355	0.00434339
					11	0.0207285	9.65585e-05	0.0612355	0.00273947			12	0.0184479	9.92461e-05	0.05748	0.00407701
					12	0.0184479	8.59351e-05	0.05748	0.00257146			13	0.00883986	4.75566e-05	0.0415453	0.00294678
					13	0.00883986	4.11783e-05	0.0415453	0.0018586			14	0.0155874	8.38567e-05	0.0380509	0.00269892
					14	0.0155874	7.26098e-05	0.0380509	0.00170227			15	0.0317888	0.000171017	0.0365984	0.00259589
					15	0.0317888	0.00014808	0.0365984	0.00163729			16	0.0335925	0.000180721	0.137638	0.00976252
					16	0.0335925	0.000156482	0.137638	0.00615744			17	0.096299	0.000518068	0.0901474	0.00639409
					17	0.096299	0.000448585	0.0901474	0.00403289			18	0.162233	0.000872781	0.0924374	0.00655652
					18	0.162233	0.000755723	0.0924374	0.00413534			19	0.162027	0.000871674	0.0727055	0.00515694
					19	0.162027	0.000754764	0.0727055	0.0032526			20	0.197612	0.00106311	0.0670136	0.00475323
					20	0.197612	0.000920526	0.0670136	0.00299796			21	0.197612	0.00106311	0.0115813	0.000821454
					21	0.197612	0.000920526	0.0115813	0.000518109			22	0.197612	0.00106311	0	0
					22	0.197612	0.000920526	0	0			23	0.197612	0.00106311	0	0
					23	0.197612	0.000920526	0	0			24+	0.197612	0.00106311	0	0
					24+	0.197612	0.000920526	0	0			Total	185.881	1	14.0986	1
					Total	214.673	1	22.353	1

[truncated: 3 more sheets: ICE 2018 stock dist by age, Survival schedule, New cases]
